# Supplementary material
Source: Research Square preprint supplement (doi:10.21203/rs.3.rs-9563929/v1)
Supplement: Supplementary file 1 [file c3c03b60ec113acbf6852f10.xlsx]

## Sheet: Shee1
	Specimen	h (mm)	C (mm)	d (mm)	fc (MPa)	(%)	Vf (%)	Fy (MPa)	Af		Vn (kN)	data type	References	FIBER	R2	Proposed model Eq. 6	Proposed model Eq. 5			RS	R2	Albostami et al. 2025	Base	Base	RS	R2	choi et al. 2007			RS	ft	fcf	Ac	AT	Cu	Fpc	R2	Ju et al. 2015			RS	sigma	F	Cu	bf	R2	Marí et al. 2023
1	S1	152	152	127	47.7	0.98	0	455	0	0	433	Training data	Cheng and Parra-Montesinos [30]	0	0.915729	355.834	359.38	77.1658	0.195645	5954.56	0.80334	370.674	62.3263	0.155104	3884.57	0.486697	135.534	297.466	1.04643	88486.1	2.0167	47.7	13024.9	81244.9	17.808	0	0.840744	222.313	210.687	0.64301	44388.9	0	0	17.808	1804.95	0.866111	321.204	111.796	0.296462
2	S2	152	152	127	47.7	0.66	0	455	0	0	379	Training data	Cheng and Parra-Montesinos [30]	0	MAE	336.074	339.636	42.9261	0.120061	1842.65	MAE	331.729	47.2712	0.133022	2234.57	MAE	86.2489	292.751	1.25847	85703.2	2.0167	47.7	8288.59	85571.4	11.9931	0	MAE	149.721	229.279	0.867295	52568.8	0	0	11.9931	1804.95	MAE	303.769	75.231	0.22037
3	S3/FRC	152	152	127	25.4	0.98	1	455	55	1	386	Training data	Cheng and Parra-Montesinos [30]	H	34.5516	345.393	350.486	40.6073	0.111041	1648.95	47.7485	385.336	0.664062	0.00172185	0.440978	142.05	205.019	180.981	0.612437	32754.1	1.47163	26.445	28083.6	69611.9	33.4425	0.291383	65.1087	312.868	73.1317	0.209286	5348.24	0.936906	0.55	33.4425	1258.95	58.4346	253.7	132.3	0.41363
4	S4/FRC	152	152	127	25.4	0.66	1	455	55	1	389	Training data	Cheng and Parra-Montesinos [30]	H	sMAPE	333.937	339.04	55.0632	0.152332	3031.96	sMAPE	346.387	42.6129	0.115892	1815.86	sMAPE	134.483	254.517	0.972396	64778.7	1.47163	26.445	17209	77737	22.5225	0.291383	sMAPE	280.654	108.346	0.323587	11738.8	0.936906	0.55	22.5225	1258.95	sMAPE	240.978	148.022	0.469928
5	S5/FRM	152	152	127	59.3	0.98	1.5	471	70	1	530	Training data	Cheng and Parra-Montesinos [30]	T	16.4026	545.213	548.322	15.2126	0.028297	231.424	25.8111	487.41	42.5905	0.0837234	1813.95	70.5922	192.236	337.764	0.93533	114085	2.24859	61.295	10539.3	83462	14.8282	0.849967	31.211	459.625	70.3748	0.142225	4952.61	2.73296	1	14.8282	812.227	28.8884	436.268	93.7324	0.194009
6	S6/FRM	152	152	127	57.9	0.66	1.5	471	70	1	444	Training data	Cheng and Parra-Montesinos [30]	T	RSME	512.013	515.225	68.0125	0.142284	4625.7	RSME	444.724	0.724039	0.00162939	0.524232	RSME	147.894	296.106	1.00054	87679	2.22189	59.895	6943.42	86885	10.2278	0.839874	RSME	436.011	7.98867	0.0181558	63.8188	2.70051	1	10.2278	812.227	RSME	410.783	33.217	0.0777204
7	S7/FRC	152	152	127	31	0.98	1.5	449	55	1	522	Training data	Cheng and Parra-Montesinos [30]	H	50.0213	395.391	400.142	126.609	0.27602	16029.9	77.3288	411.909	110.091	0.235763	12120	188.848	197.944	324.056	0.900224	105012	1.62579	32.5675	21507.2	74375.8	27.0399	0.482859	92.1147	338.649	183.351	0.426076	33617.6	1.55257	0.825	27.0399	985.954	77.1128	291.706	230.294	0.566038
9	S9/FRC	152	152	127	46.1	0.98	1.5	449	79	1	530	Training data	Cheng and Parra-Montesinos [30]	H	Test	477.274	481.147	52.7265	0.104692	2780.08	Test	452.194	77.8061	0.158433	6053.8	Test	197.828	332.172	0.912778	110339	1.98259	48.3515	13346.5	80965.8	18.183	0.845774	Test	442.435	87.5654	0.180095	7667.7	2.71948	1	18.183	812.227	Test	376.382	153.618	0.338968
10	S10/FRC	152	152	127	59.1	0.66	1.5	449	79	1	503	Training data	Cheng and Parra-Montesinos [30]	H	R2	517.546	520.69	14.5465	0.0285072	211.6	R2	447.925	55.0745	0.115834	3033.2	R2	152.362	350.638	1.07006	122947	2.24479	61.3515	6439.97	87387.7	9.55208	0.957629	R2	486.523	16.4767	0.0333023	271.481	3.07914	1	9.55208	812.227	R2	418.129	84.8709	0.184276
11	FS-1	125	150	100	35.4	0.56	0	460	0	0	173.5	Training data	Theodorakopoulos and Swamy [31]	0	0.938797	212.853	215.127	39.3532	0.203716	1548.68	0.801117	217.412	43.9116	0.224663	1928.23	0.556674	65.4208	108.079	0.904728	11681.1	1.73734	35.4	7374.81	57593.3	10.9153	0	0.679653	86.4221	87.0779	0.670031	7582.57	0	0	10.9153	1542.48	0.889359	181.587	8.08672	0.0455478
12	FS-2	125	150	100	34	0.56	0.5	460	100	0.75	225	Training data	Theodorakopoulos and Swamy [31]	C	MAE	238.873	241.37	13.8733	0.0598152	192.47	MAE	234.841	9.84091	0.0428014	96.8436	MAE	82.2881	142.712	0.928847	20366.7	1.70264	34.7125	7713.88	57302.7	11.3647	0.306475	MAE	183.29	41.7104	0.204318	1739.76	0.739073	0.375	11.3647	1224.34	MAE	194.458	30.5416	0.145624
13	FS-3	125	150	100	35.6	0.56	1	460	100	0.75	247.4	Training data	Theodorakopoulos and Swamy [31]	C	37.9691	257.684	260.098	10.2842	0.0407225	105.764	51.1457	248.123	0.723087	0.00291848	0.522854	132.4	97.8002	149.6	0.866743	22380.1	1.74224	37.025	7328.77	57632.9	10.8539	0.627206	72.4053	225.503	21.8966	0.0926049	479.46	1.51253	0.75	10.8539	906.207	52.2944	207.003	40.3971	0.177803
15	FS-5	125	150	100	38	0.37	1	460	100	0.75	198.1	Training data	Theodorakopoulos and Swamy [31]	C	sMAPE	257.589	259.903	59.4892	0.261096	3538.97	sMAPE	154.59	43.5104	0.246735	1893.15	sMAPE	75.1448	122.955	0.899964	15118	1.80001	39.425	4343.85	60306.5	6.71842	0.648003	sMAPE	222.445	24.3452	0.115779	592.688	1.56268	0.75	6.71842	906.207	sMAPE	205.508	7.40758	0.0367068
16	FS-6	125	150	100	35.7	0.37	1	460	100	0.75	174.5	Training data	Theodorakopoulos and Swamy [31]		18.2313	252.089	254.504	77.589	0.363765	6020.06	36.3356	148.97	25.5295	0.157848	651.757	68.8542	74.8818	99.6182	0.798922	9923.79	1.74468	37.125	4645.16	60026.7	7.15126	0.628087	36.0544	215.79	41.2897	0.211585	1704.84	1.51465	0.75	7.15126	906.207	25.5573	197.797	23.2966	0.125151
17	FS-7	125	150	100	36.6	0.37	1	460	100	0.75	192.4	Training data	Theodorakopoulos and Swamy [31]		RSME	254.251	256.626	61.8513	0.276956	3825.58	RSME	151.169	41.2307	0.240014	1699.97	RSME	74.9785	117.421	0.878317	13787.8	1.76654	38.025	4522.43	60140.4	6.97541	0.635954	RSME	218.422	26.0221	0.126683	677.148	1.53362	0.75	6.97541	906.207	RSME	200.836	8.43568	0.0429039
18	FS-19	125	150	100	34.5	0.37	0	460	0	0	136.5	Training data	Theodorakopoulos and Swamy [31]	0	49.8555	206.149	208.463	69.6489	0.406532	4850.96	76.931	116.719	19.7809	0.156236	391.284	179.59	41.952	94.548	1.05965	8939.33	1.71511	34.5	4819.49	59865.9	7.4	0	116.068	57.1003	79.3997	0.820244	6304.31	0	0	7.4	1542.48	71.3221	169.411	32.9106	0.215165
19	FS-20	125	150	100	37	0.37	1	460	100	0.75	211	Training data	Theodorakopoulos and Swamy [31]	C		255.208	257.566	44.2081	0.18965	1954.36		152.147	58.8535	0.324131	3463.73		75.0241	135.976	0.9508	18489.4	1.77617	38.425	4469.94	60189.1	6.9	0.63942		219.58	8.58027	0.0398544	73.621	1.54198	0.75	6.9	906.207		202.177	8.82272	0.0427067
20	FS-8	125	100	100	36.7	0.56	0	460	0	0	150.3	Training data	Theodorakopoulos and Swamy [31]	0	Taining	178.67	180.927	28.3699	0.172477	804.853	Taining	177.965	27.6649	0.168552	765.345	Taining	45.3596	104.94	1.07268	11012.5	1.76895	36.7	4979.65	48896.1	10.5286	0	Taining	75.2165	75.0835	0.665881	5637.54	0	0	10.5286	1342.48	Taining	139.165	11.1355	0.0769385
21	FS-9	125	100	100	35.6	0.56	1	460	100	0.75	216.6	Training data	Theodorakopoulos and Swamy [31]	C	R2	218.732	221.185	2.13178	0.00979381	4.54448	R2	206.8	9.79971	0.0462905	96.0342	R2	73.2619	143.338	0.98901	20545.8	1.74224	37.025	5157.98	48718.3	10.8539	0.627206	R2	196.264	20.3357	0.0985101	413.539	1.51253	0.75	10.8539	788.707	R2	155.881	60.7189	0.326024
22	FS-10	125	200	100	36.4	0.56	0	460	0	0	191.4	Training data	Theodorakopoulos and Swamy [31]	0	0.917714	257.409	259.6	66.0091	0.294152	4357.21	0.804396	260.178	68.7775	0.30461	4730.35	0.478522	83.962	107.438	0.78034	11542.9	1.76171	36.4	9273.22	66725.6	10.6154	0	0.862786	97.6277	93.7723	0.648881	8793.25	0	0	10.6154	1742.48	0.870921	230.803	39.403	0.186654
24	FS-12	125	150	100	36.1	0.56	1	460	60	1	217.5	Training data	Theodorakopoulos and Swamy [31]	J	MAE	264.312	266.761	46.8123	0.194317	2191.39	MAE	249.345	31.8446	0.136425	1014.08	MAE	84.8413	132.659	0.877543	17598.3	1.75443	37.24	7216.11	57730.1	10.7036	0.378957	MAE	218.703	1.20273	0.00551452	1.44655	1.21849	0.6	10.7036	1033.46	MAE	208.763	8.7366	0.0409916
25	FS-13	125	150	100	33.5	0.56	1	460	100	1	235.5	Training data	Theodorakopoulos and Swamy [31]	H	34.0491	257.424	259.989	21.9236	0.0889532	480.642	47.249	242.993	7.49256	0.0313174	56.1385	143.469	98.6941	136.806	0.818721	18715.8	1.69007	35.4	7842.57	57193.1	11.5343	0.608426	64.0356	210.674	24.8264	0.111286	616.348	1.95632	1	11.5343	694.116	59.3376	203.963	31.5372	0.143526
26	FS-14	125	150	100	35	0.56	1	460	70	0.5	239.5	Training data	Theodorakopoulos and Swamy [31]	P	sMAPE	250.859	253.241	11.3592	0.0463301	129.031	sMAPE	246.657	7.15722	0.0294441	51.2258	sMAPE	87.9671	151.533	0.925485	22962.2	1.7275	35.665	7468.64	57512.6	11.04	0.435329	sMAPE	180.681	58.8193	0.279971	3459.71	0.699872	0.35	11.04	1245.55	sMAPE	201.313	38.1873	0.173258
27	FS-15	125	150	100	31.2	0.56	1	460	89	0.75	238	Training data	Theodorakopoulos and Swamy [31]	C	16.1336	246.18	248.786	8.17963	0.0337876	66.9064	24.2633	237.373	0.626585	0.00263618	0.392609	70.8478	95.6014	142.399	0.853705	20277.4	1.63102	32.4682	8493.68	56643.3	12.3846	0.52258	30.4987	208.829	29.1714	0.130571	850.969	1.26022	0.6675	12.3846	976.197	29.3783	190.019	47.9807	0.224199
28	FS-16	125	150	100	27.9	0.56	1	460	70	0.5	227.8	Training data	Theodorakopoulos and Swamy [31]	P	RSME	232.458	235.144	4.65772	0.0202396	21.6943	RSME	229.311	1.51116	0.00661179	2.28361	RSME	91.3418	136.458	0.855157	18620.8	1.54236	28.565	9638.9	55696.3	13.8495	0.388674	RSME	165.669	62.1309	0.315811	3860.25	0.624866	0.35	13.8495	1245.55	RSME	175.5	52.2999	0.25936
29	FS-17	125	150	100	46.8	0.56	1	460	71	0.5	268.4	Training data	Theodorakopoulos and Swamy [31]	P	50.0456	279.659	281.537	11.2591	0.0410871	126.767	77.3871	275.486	7.08589	0.0260565	50.2098	190.172	85.7332	182.667	1.03163	33367.2	1.99759	47.4745	5426.25	59312.2	8.25641	0.510583	88.0443	203.226	65.1737	0.276379	4247.62	0.820858	0.355	8.25641	1241.31	77.9281	240.306	28.0936	0.110451
31	P11F0	155	200	132.7	33.2	0.5	0	438	0	0	257	Training data	Alexander and Simmonds [32]	0		365.847	370.588	108.847	0.349516	11847.8		320.697	63.6973	0.220521	4057.35		92.2422	164.758	0.943516	27145.1	1.68249	33.2	11698.8	102807	13.1301	0		129.619	127.381	0.658945	16225.8	0	0	13.1301	2050.67		304.131	47.131	0.167986
33	P11F66	155	200	132.7	35	0.5	0.84	438	79	0.75	345	Training data	Alexander and Simmonds [32]	C		437.274	442.187	92.2744	0.235913	8514.56		379.874	34.8739	0.0962206	1216.19		128.567	216.433	0.914052	46843	1.7275	35.9456	11038.9	103387	12.4548	0.412692		349.005	4.00479	0.0115411	16.0383	0.995218	0.4977	12.4548	1489.33		358.638	13.6378	0.0387638
34	P38F0	155	200	105.7	38.1	0.63	0	438	0	0	264	Training data	Alexander and Simmonds [32]			282.118	284.59	18.1175	0.0663503	328.245		295.887	31.887	0.113905	1016.78		93.2674	170.733	0.955769	29149.6	1.80238	38.1	10100.2	72193.8	11.483	0		113.947	150.053	0.794041	22515.8	0	0	11.483	1796.2		257.678	6.32203	0.0242373
36	P38F69	155	200	105.7	38.5	0.63	0.88	438	79	0.75	330	Training data	Alexander and Simmonds [32]	C		333.922	336.534	3.92222	0.0118153	15.3838		332.733	2.73347	0.00824909	7.47187		122.425	207.575	0.917611	43087.4	1.81181	39.4907	9985.87	72285.2	11.3637	0.453446		270.251	59.7486	0.199079	3569.9	1.0935	0.5214	11.3637	1281.1		295.454	34.5464	0.110468
37	L1	100	80	80	23.1	1.56	0	450	0	0	137.2	Training data	Hanai and Holanda [28]	0		118.941	120.564	18.2594	0.142573	333.405		170.783	33.5828	0.218083	1127.81		143.28	6.07967	0.0433519	36.9623	1.40342	23.1	20885.7	19032.4	36.4675	0		131.185	6.015	0.0448237	36.1803	0	0	36.4675	1073.98		79.1825	58.0175	0.536249
38	L2	100	80	80	24.4	1.56	1	450	55	1	139.6	Training data	Hanai and Holanda [28]	H		145.386	147.139	5.78617	0.0406067	33.4798		172.296	32.6958	0.209658	1069.01		145.493	5.89256	0.0413379	34.7223	1.44237	25.445	19308.1	19881.8	34.5246	0.28559		136.235	3.36537	0.0244013	11.3257	0.918278	0.55	34.5246	749.104		89.1443	50.4557	0.441153
39	L3	100	80	80	28.1	1.56	2	450	55	1	163.6	Training data	Hanai and Holanda [28]	H		170.362	171.966	6.76163	0.0404934	45.7196		185.328	21.7284	0.124544	472.125		141.145	22.4547	0.147367	504.214	1.54788	30.19	15821.3	21869.3	29.9786	0.612959		127.167	36.4327	0.250597	1327.34	1.97089	1	29.9786	483.293		98.9038	64.6962	0.492916
40	L4	100	80	80	57	1.56	0	450	0	0	192.9	Training data	Hanai and Holanda [28]	0		170.31	170.84	22.5902	0.124392	510.318		219.704	26.8042	0.129927	718.464		83.1483	109.752	0.795163	12045.4	2.20455	57	6242.89	28514.6	14.7789	0		131.185	61.715	0.380857	3808.74	0	0	14.7789	1073.98		134.318	58.5816	0.358058
42	L6	100	80	80	52.4	1.56	2	450	55	1	236.2	Training data	Hanai and Holanda [28]	H		238.787	239.497	2.58672	0.0108917	6.6911		254.761	18.5613	0.0756122	344.523		108.701	127.499	0.739338	16256	2.11373	54.49	6935.48	27947.4	16.0763	0.837035		177.934	58.2664	0.28139	3394.98	2.69138	1	16.0763	483.293		143.21	92.9905	0.490185
44	L7	100	80	80	36.6	1.56	0.75	450	48	1	182.5	Training data	Hanai and Holanda [28]	H		168.834	170.147	13.6661	0.0777958	186.764		199.964	17.4637	0.0913223	304.982		111.952	70.5483	0.479184	4977.06	1.76654	37.284	11036.4	24913.2	23.0164	0.228944		156.878	25.6221	0.150994	656.491	0.736139	0.36	23.0164	861.335		111.57	70.9305	0.482406
45	L8	100	80	80	46.1	1.56	1.5	450	48	1	210.9	Training data	Hanai and Holanda [28]	H		208.383	209.335	2.51716	0.012007	6.3361		231.363	20.4628	0.0925369	418.727		106.267	104.633	0.659795	10948	1.98259	47.468	8161.49	26986.9	18.2733	0.513888		173.847	37.0529	0.192609	1372.92	1.65234	0.72	18.2733	648.686		131.06	79.8402	0.466957
47	S-2	125	150	100	39	0.56	0.6	460	100	0.75	243.6	Training data	Swamy and Ali [33]	C		252.889	255.165	9.28858	0.0374171	86.2777		248.025	4.42516	0.0180022	19.582		83.6178	159.982	0.977833	25594.3	1.82354	39.855	6624.88	58244.7	9.90769	0.393885		207.073	36.5272	0.162101	1334.23	0.949864	0.45	9.90769	1160.72		213.276	30.3242	0.132746
48	S-3	125	150	100	37.8	0.56	0.9	460	100	0.75	262.9	Training data	Swamy and Ali [33]	C		260.05	262.37	2.85043	0.0109014	8.12494		251.609	11.2906	0.0438888	127.477		94.0816	168.818	0.94581	28499.7	1.79527	39.0825	6857.48	58041.3	10.2222	0.581666		228.988	33.912	0.137885	1150.03	1.40271	0.675	10.2222	969.834		213.592	49.3079	0.206962
49	S-4	125	150	100	36.9	0.56	1.2	460	100	0.75	281	Training data	Swamy and Ali [33]	C		267.386	269.738	13.6138	0.0496506	185.337		254.781	26.2189	0.0978715	687.429		104.205	176.795	0.917928	31256.5	1.77376	38.61	7042.82	57880.1	10.4715	0.766266		227.924	53.0759	0.208581	2817.05	1.84787	0.9	10.4715	778.952		213.352	67.6476	0.273682
50	S-5	125	150	100	37.8	0.56	0.9	460	100	0.75	267.2	Training data	Swamy and Ali [33]	C		260.05	262.37	7.15043	0.0271235	51.1286		251.609	15.5906	0.0601014	243.067		94.0816	173.118	0.958357	29970	1.79527	39.0825	6857.48	58041.3	10.2222	0.581666		228.988	38.212	0.154022	1460.16	1.40271	0.675	10.2222	969.834		213.592	53.6079	0.222998
52	S-7	125	150	100	38.9	0.74	0	460	0	0	221.7	Training data	Swamy and Ali [33]	0		223.969	226.097	2.2689	0.010182	5.14791		259.541	37.8406	0.157263	1431.91		86.226	135.474	0.879912	18353.2	1.8212	38.9	9069.55	56164.1	13.126	0		114.201	107.499	0.640067	11556.1	0	0	13.126	1542.48		199.671	22.029	0.104559
53	S-13	125	150	100	39.3	0.74	0.9	460	83	0.5	236.7	Training data	Swamy and Ali [33]	Pl		264.223	266.419	27.5228	0.109888	757.506		292.278	55.578	0.210133	3088.91		110.584	126.116	0.726301	15905.3	1.83054	40.0097	8965.21	56250.4	12.9924	0.492269		211.425	25.2746	0.112801	638.805	0.791414	0.3735	12.9924	1225.62		224.247	12.453	0.0540321
54	S-12	125	150	100	36.8	0.74	0.9	460	100	1	249	Training data	Swamy and Ali [33]	H		268.746	271.162	19.7463	0.076278	389.917		286.298	37.2985	0.139356	1391.18		117.738	131.262	0.715838	17229.8	1.77136	38.51	9659.13	55679.8	13.875	0.573921		234.706	14.2936	0.0591004	204.308	1.84537	0.9	13.875	778.952		222.376	26.6241	0.112963
55	S-11	125	150	100	37.1	0.74	0.9	460	100	0.75	262	Training data	Swamy and Ali [33]	C		264.09	266.436	2.0899	0.00794504	4.3677		287.016	25.016	0.0911304	625.802		117.111	144.889	0.764363	20992.9	1.77857	38.3825	9570.33	55752.3	13.7628	0.576255		238.005	23.9946	0.0959774	575.741	1.38966	0.675	13.7628	969.834		218.535	43.4654	0.180904
56	S-8	125	150	100	41.1	0.74	0.9	460	100	0.75	255.7	Training data	Swamy and Ali [33]	C		274.452	276.623	18.7519	0.0707414	351.632		296.583	40.8832	0.148052	1671.44		115.351	140.349	0.756495	19697.9	1.87199	42.3825	8523.59	56618.3	12.4234	0.606525		249.453	6.24718	0.0247338	39.0273	1.46265	0.675	12.4234	969.834		232.472	23.2277	0.0951618
57	S-16	125	150	100	38.9	0.56	0.9	460	100	1	213	Training data	Swamy and Ali [33]	H		268.17	270.497	55.1701	0.229317	3043.74		254.24	41.2404	0.176527	1700.77		94.2097	118.79	0.77335	14111.1	1.8212	40.61	6643.66	58228.2	9.93316	0.590069		233.99	20.9901	0.0939174	440.583	1.89729	0.9	9.93316	778.952		222.44	9.44022	0.0433594
58	S-10	125	150	100	38.9	0.46	0.9	460	100	0.75	203	Training data	Swamy and Ali [33]	C		259.384	261.659	56.3836	0.243882	3179.11		215.947	12.947	0.0618072	167.624		82.0542	120.946	0.848581	14627.9	1.8212	40.1825	5357	59375	8.15938	0.590069		225.879	22.8787	0.106691	523.434	1.42297	0.675	8.15938	969.834		212.437	9.43741	0.0454336
60	S-19	125	150	100	38.9	0.37	0	460	0	0	130.7	Training data	Swamy and Ali [33]	0		212.417	214.555	81.7166	0.47632	6677.6		123.069	7.63123	0.0601432	58.2357		40.2752	90.4248	1.05775	8176.65	1.8212	38.9	4236.28	60407	6.56298	0		57.1003	73.5997	0.783808	5416.92	0	0	6.56298	1542.48		182.163	51.4635	0.328984
61	NU	150	225	109	30	1.12	0	434	0	0	306	Training data	McHarg et al. [34]	0		317.713	320.718	11.7131	0.0375592	137.196		374.518	68.5176	0.201369	4694.67		220.712	85.2884	0.323852	7274.11	1.59935	30	28705.6	68291.2	26.4914	0		222.097	83.9026	0.317754	7039.64	0	0	26.4914	1927.3		277.413	28.587	0.0979993
62	NB	150	225	109	30	2.18	0	434	0	0	349	Training data	McHarg et al. [34]	0		348.038	351.018	0.962113	0.00276058	0.925661		429.633	80.6334	0.207115	6501.74		498.485	149.485	0.352772	22345.6	1.59935	30	64832.7	47539.3	51.5635	0		432.297	83.2968	0.213227	6938.36	0	0	51.5635	1927.3		309.812	39.1879	0.118965
63	FSU	150	225	109	41.5	1.12	0.5	434	60	1	422	Training data	McHarg et al. [34]	H		397.557	400.28	24.4429	0.0596491	597.456		422.159	0.158967	0.000376628	0.0252706		207.31	214.69	0.682304	46091.9	1.88108	42.07	19776.8	74367.2	19.1504	0.203156		320.519	101.481	0.273343	10298.4	0.653224	0.3	19.1504	1609.3		370.754	51.246	0.129286
64	FSB	150	225	109	41.5	2.18	0.5	434	60	1	438	Training data	McHarg et al. [34]	H		443.524	446.209	5.52443	0.0125338	30.5193		477.283	39.2832	0.0858384	1543.17		434.471	3.52871	0.00808899	12.4518	1.88108	42.07	43176	59365.8	37.2748	0.203156		468.789	30.7895	0.0679088	947.993	0.653224	0.3	37.2748	1609.3		408.86	29.1397	0.0688181
65	B1-01	120	60	90	99	0.87	0	400	0	0.5	262	Training data	Suter and Moreillon [35]	s		229.785	229.222	32.2148	0.131012	1037.8		256.522	5.47806	0.0211295	30.0091		25.1851	236.815	1.64921	56081.3	2.90536	99	1294.97	36817.2	4.74545	0		74.1315	187.869	1.11783	35294.6	0	0	4.74545	1088.23		168.632	93.3678	0.433631
67	B3-01	120	60	90	108	0.87	0.51	400	65	0.5	343	Training data	Suter and Moreillon [35]	s		278.145	277.212	64.8545	0.208822	4206.11		334.983	8.01712	0.0236499	64.2741		36.0101	306.99	1.61996	94242.8	3.03455	108.315	1175.13	36988	4.35	0.362144		137.9	205.1	0.852983	42066	0.582213	0.16575	4.35	989.026		192.156	150.844	0.563738
68	B4-01	120	60	90	106	0.87	0.76	400	65	0.5	337	Training data	Suter and Moreillon [35]	s		293.233	292.36	43.7673	0.138892	1915.57		345.452	8.45189	0.0247692	71.4345		41.7072	295.293	1.55948	87197.8	3.00632	106.469	1199.83	36952.5	4.43208	0.534645		162.967	174.033	0.696178	30287.5	0.859541	0.247	4.43208	940.396		193.836	143.164	0.539392
69	B5-01	120	60	90	107	0.87	1.02	400	65	0.5	369	Training data	Suter and Moreillon [35]	s		313.97	313.043	55.0303	0.16115	3028.33		361.037	7.96263	0.0218143	63.4034		47.6109	321.389	1.54287	103291	3.02047	107.63	1187.35	36970.4	4.39065	0.720926		186.871	182.129	0.655291	33170.9	1.15902	0.3315	4.39065	889.82		197.881	171.119	0.603721
70	B1-05	120	60	92	99	0.55	0	400	0	0.5	201	Training data	Suter and Moreillon [35]	s		215.552	215.069	14.5522	0.0698696	211.765		210.741	9.74126	0.0473174	94.8921		15.4962	185.504	1.71369	34411.7	2.90536	99	801.173	39022.2	3.06667	0		48.7359	152.264	1.2194	23184.3	0	0	3.06667	1107.08		164.145	36.8547	0.201863
71	B3-05	120	60	92	108	0.55	0.51	400	65	0.5	286	Training data	Suter and Moreillon [35]	s		263.992	263.131	22.008	0.0800302	484.351		290.606	4.60623	0.0159771	21.2174		27.342	258.658	1.65096	66904	3.03455	108.315	729.43	39134.3	2.81111	0.362144		119.006	166.994	0.824651	27887.1	0.582213	0.16575	2.81111	1006.16		188.026	97.9741	0.41337
72	B5-05	120	60	92	107	0.55	1.02	400	65	0.5	327	Training data	Suter and Moreillon [35]	s		301.635	300.78	25.3647	0.0806978	643.37		317.231	9.76869	0.0303266	95.4272		39.5626	287.437	1.56829	82620.3	3.02047	107.63	736.764	39122.8	2.83738	0.720926		173.624	153.376	0.612739	23524.2	1.15902	0.3315	2.83738	905.233		193.99	133.01	0.510603
73	B1-06	120	60	88	99	1.29	0	400	0	0.5	252	Training data	Suter and Moreillon [35]	s		248.767	248.124	3.23268	0.0129109	10.4502		273.99	21.9903	0.0836147	483.572		38.7098	213.29	1.46738	45492.7	2.90536	99	1979.23	34469.5	6.88	0		105.615	146.385	0.818676	21428.6	0	0	6.88	1069.38		172.489	79.5111	0.374621
74	B3-06	120	60	88	108	1.29	0.51	400	65	0.5	361	Training data	Suter and Moreillon [35]	s		297.51	296.503	63.4898	0.192829	4030.95		351.049	9.95081	0.0279498	99.0186		48.2624	312.738	1.5283	97804.8	3.03455	108.315	1789.23	34713.1	6.30667	0.362144		162.09	198.91	0.760519	39565.1	0.582213	0.16575	6.30667	971.895		195.637	165.363	0.594151
75	B5-06	120	60	88	107	1.29	1.02	400	65	0.5	402	Training data	Suter and Moreillon [35]	s		331.504	330.504	70.4964	0.192218	4969.74		376.535	25.4652	0.0654184	648.479		59.2299	342.77	1.48633	117491	3.02047	107.63	1808.56	34688.1	6.36561	0.720926		204.667	197.333	0.650549	38940.4	1.15902	0.3315	6.36561	874.407		201.128	200.872	0.666099
77	A1	125	200	105	22.3	0.66	0.4	492	80	1	330	Training data	Nguyen-Minh et al. [36]	H		279.856	283.252	50.1441	0.164446	2514.43		290.495	39.5047	0.127333	1560.62		147.712	182.288	0.76317	33228.8	1.37891	22.908	21992.5	62683.9	22.9343	0.15885		197.745	132.255	0.501206	17491.3	0.510763	0.32	22.9343	1474.63		204.473	125.527	0.469725
78	A2	125	200	105	23.4	0.66	0.6	492	80	1	345	Training data	Nguyen-Minh et al. [36]	H		287.419	290.76	57.581	0.182098	3315.57		296.334	48.666	0.151765	2368.38		150.374	194.626	0.785776	37879.4	1.41251	24.312	20795.3	63507.3	21.8562	0.244081		220.581	124.419	0.439968	15480	0.784812	0.48	21.8562	1317.15		214.621	130.379	0.465955
79	A3	125	200	105	25.3	0.66	0.8	492	80	1	397	Training data	Nguyen-Minh et al. [36]	H		297.816	301.063	99.184	0.285497	9837.46		303.906	93.0942	0.26564	8666.53		152.029	244.971	0.892381	60011	1.46873	26.516	19003.7	64761.1	20.2148	0.338396		238.982	158.018	0.496926	24969.7	1.08807	0.64	20.2148	1159.66		227.976	169.024	0.540897
80	B0	125	200	105	21.7	0.66	0	492	0	0	301	Training data	Nguyen-Minh et al. [36]	0		248.389	251.51	52.611	0.191526	2767.92		276.723	24.2767	0.0840425	589.356		139.019	161.981	0.736247	26237.9	1.36023	21.7	22704.1	62199.5	23.5684	0		132.713	168.287	0.776027	28320.4	0	0	23.5684	1789.6		184.012	116.988	0.482414
81	B1	125	200	105	22.3	0.66	0.4	492	80	1	328	Training data	Nguyen-Minh et al. [36]	H		279.856	283.252	48.1441	0.158406	2317.86		290.495	37.5047	0.121277	1406.6		147.712	180.288	0.75797	32503.7	1.37891	22.908	21992.5	62683.9	22.9343	0.15885		197.745	130.255	0.495505	16966.3	0.510763	0.32	22.9343	1474.63		204.473	123.527	0.463977
82	B2	125	200	105	23.4	0.66	0.6	492	80	1	337	Training data	Nguyen-Minh et al. [36]	H		287.419	290.76	49.581	0.158807	2458.28		296.334	40.666	0.128419	1653.72		150.374	186.626	0.765845	34829.4	1.41251	24.312	20795.3	63507.3	21.8562	0.244081		220.581	116.419	0.417585	13553.3	0.784812	0.48	21.8562	1317.15		214.621	122.379	0.443707
83	B3	125	200	105	25.3	0.66	0.8	492	80	1	347	Training data	Nguyen-Minh et al. [36]	H		297.816	301.063	49.184	0.152552	2419.06		303.906	43.0942	0.132413	1857.11		152.029	194.971	0.781404	38013.8	1.46873	26.516	19003.7	64761.1	20.2148	0.338396		238.982	108.018	0.368674	11667.9	1.08807	0.64	20.2148	1159.66		227.976	119.024	0.414013
84	C0	125	200	105	21.7	0.66	0	492	0	0	264	Training data	Nguyen-Minh et al. [36]	0		248.389	251.51	15.611	0.0609342	243.704		276.723	12.7233	0.0470605	161.884		139.019	124.981	0.620226	15620.3	1.36023	21.7	22704.1	62199.5	23.5684	0		132.713	131.287	0.661872	17236.2	0	0	23.5684	1789.6		184.012	79.9883	0.357081
85	C1	125	200	105	22.3	0.66	0.4	492	80	1	307	Training data	Nguyen-Minh et al. [36]	H		279.856	283.252	27.1441	0.0925069	736.803		290.495	16.5047	0.0552462	272.404		147.712	159.288	0.700609	25372.6	1.37891	22.908	21992.5	62683.9	22.9343	0.15885		197.745	109.255	0.43291	11936.6	0.510763	0.32	22.9343	1474.63		204.473	102.527	0.400911
86	C2	125	200	105	23.4	0.66	0.6	492	80	1	310	Training data	Nguyen-Minh et al. [36]	H		287.419	290.76	22.581	0.0755952	509.902		296.334	13.666	0.0450774	186.759		150.374	159.626	0.693464	25480.6	1.41251	24.312	20795.3	63507.3	21.8562	0.244081		220.581	89.4188	0.33706	7995.72	0.784812	0.48	21.8562	1317.15		214.621	95.379	0.363611
87	C3	125	200	105	25.3	0.66	0.8	492	80	1	326	Training data	Nguyen-Minh et al. [36]	H		297.816	301.063	28.184	0.0903599	794.337		303.906	22.0942	0.0701508	488.153		152.029	173.971	0.72787	30266	1.46873	26.516	19003.7	64761.1	20.2148	0.338396		238.982	87.0181	0.308039	7572.15	1.08807	0.64	20.2148	1159.66		227.976	98.0238	0.353892
88	A1	55	100	39	29.6	1.12	0	501	0	0	58.8	Training data	Harajli et al. [37]	0		62.4192	62.4721	3.61923	0.0597139	13.0989		71.0584	12.2584	0.188796	150.268		52.0568	6.7432	0.121656	45.4707	1.58865	29.6	5288.14	9353.72	11.0897	0		36.5339	22.2661	0.467118	495.779	0	0	11.0897	767.567		42.1038	16.6962	0.330933
89	A2	55	100	39	30	1.12	0.45	501	100	1	63.6	Training data	Harajli et al. [37]	H		69.8351	69.8971	6.23514	0.0934558	38.877		47.3199	16.2801	0.293546	265.04		54.5526	9.04738	0.153147	81.8551	1.59935	30.855	5206.42	9403.27	10.9418	0.259095		46.7985	16.8015	0.30438	282.292	0.833086	0.45	10.9418	577.594		44.3608	19.2392	0.35641
92	A5	55	100	39	20	1.12	2	501	60	1	58.3	Training data	Harajli et al. [37]	H		69.4883	69.7257	11.1883	0.175106	125.177		-2.42793	60.7279	2	3687.88		69.1907	10.8907	0.170848	118.608	1.30586	22.28	8431.9	7569.77	16.4128	0.564133		36.677	21.623	0.455331	467.553	1.8139	1	16.4128	345.405		35.5544	22.7456	0.4847
93	B1	75	100	55	31.4	1.12	0	501	0	0	91.8	Training data	Harajli et al. [37]	0		86.7827	87.1743	5.01727	0.0561898	25.173		117.549	25.7485	0.245987	662.987		69.8361	21.9639	0.27177	482.414	1.63624	31.4	7403.36	15723.5	14.7428	0		61.6442	30.1558	0.393052	909.369	0	0	14.7428	918.364		65.5917	26.2083	0.333033
94	B2	75	100	55	31.4	1.12	0.45	501	100	1	105.9	Training data	Harajli et al. [37]	H		98.4629	98.9118	7.43713	0.0727835	55.3109		104.518	1.38165	0.0131324	1.90896		74.3282	31.5718	0.350354	996.781	1.63624	32.255	7403.36	15723.5	14.7428	0.265071		80.2947	25.6053	0.275037	655.63	0.852303	0.45	14.7428	691.069		69.7626	36.1374	0.41144
95	B3	75	100	55	31.8	1.12	0.8	501	100	1	108.4	Training data	Harajli et al. [37]	H		101.873	102.31	6.52666	0.0620778	42.5973		102.212	6.18828	0.0587648	38.2948		77.4438	30.9562	0.333142	958.287	1.64663	33.32	7291.53	15795.9	14.5574	0.47423		79.873	28.527	0.303039	813.789	1.52483	0.8	14.5574	514.284		71.3877	37.0123	0.411734
96	B4	75	100	55	29.1	1.12	1	501	60	1	108.8	Training data	Harajli et al. [37]	H		100.876	101.378	7.92437	0.075587	62.7957		94.2913	14.5087	0.142879	210.503		78.2223	30.5777	0.326996	934.998	1.57518	30.24	8116.96	15268.3	15.908	0.340238		78.9311	29.8689	0.31821	892.153	1.09399	0.6	15.908	615.304		67.2183	41.5817	0.47247
97	B5	75	100	55	29.2	1.12	2	501	60	1	134.5	Training data	Harajli et al. [37]	H		109.024	109.517	25.476	0.209228	649.025		89.1456	45.3544	0.405592	2057.02		83.9036	50.5964	0.46333	2560	1.57788	31.48	8083.18	15289.6	15.8536	0.681645		78.4442	56.0558	0.526483	3142.25	2.19174	1	15.8536	413.264		68.4866	66.0134	0.650421
98	S11	60	100	44	35.4	1.61	0.5	670	133	0.5	89.5	Training data	Yaseen [38]	Pl		80.5375	80.5901	8.96251	0.105418	80.3266		94.1068	4.60682	0.0501814	21.2228		122.167	32.6667	0.308661	1067.11	1.73734	36.0317	10847.5	8419.79	20.1114	0.415919		83.9279	5.57212	0.0642586	31.0485	0.668667	0.3325	20.1114	665.705		59.6555	29.8445	0.400179
100	S13	60	100	44	55.1	1.61	0.5	670	133	0.5	129.5	Training data	Yaseen [38]	Pl		91.8886	91.5708	37.6114	0.339777	1414.61		136.466	6.96604	0.0523829	48.5257		100.852	28.6479	0.248732	820.704	2.1675	55.7317	6325.33	10954.1	12.9209	0.518899		93.4032	36.0968	0.323879	1302.98	0.834227	0.3325	12.9209	665.705		77.4339	52.0661	0.503214
101	S14	60	100	44	65.1	1.61	0.5	670	133	0.5	141	Training data	Yaseen [38]	Pl		97.3699	96.8642	43.6301	0.366071	1903.59		157.968	16.9682	0.113512	287.919		94.8664	46.1336	0.391184	2128.31	2.35599	65.7317	5203.27	11653.7	10.9361	0.564024		97.2628	43.7372	0.367134	1912.94	0.906774	0.3325	10.9361	665.705		85.4642	55.5358	0.49046
102	S21	60	100	44	42.2	1.61	0	670	0	0	93.3	Training data	Yaseen [38]	0		77.388	77.3166	15.912	0.186445	253.191		122.176	28.8765	0.268025	833.852		108.08	14.7802	0.146789	218.454	1.89688	42.2	8720.68	9562.01	16.8707	0		84.1019	9.19813	0.103698	84.6056	0	0	16.8707	814.691		63.2742	30.0258	0.383534
103	S22	60	100	44	48.8	1.61	0.25	670	133	0.5	98	Training data	Yaseen [38]	Pl		86.3129	86.1151	11.6871	0.126818	136.588		124.845	26.8454	0.240933	720.676		103.334	5.3338	0.0529847	28.4494	2.03982	49.1159	7310.56	10366.2	14.589	0.244167		88.6321	9.36788	0.100389	87.7573	0.392544	0.16625	14.589	740.198		70.9977	27.0023	0.319558
104	S23	60	100	44	52.4	1.61	0.75	670	133	0.5	125.5	Training data	Yaseen [38]	Pl		92.5707	92.3017	32.9293	0.302006	1084.34		130.07	4.56993	0.0357627	20.8843		105.47	20.0297	0.17344	401.189	2.11373	53.3476	6713.93	10719.5	13.5867	0.759039		92.4084	33.0916	0.30372	1095.05	1.2203	0.49875	13.5867	591.211		75.8537	49.6463	0.493125
105	S24	60	100	44	53.3	1.61	1	670	133	0.5	138	Training data	Yaseen [38]	Pl		95.3387	95.0509	42.6613	0.36566	1819.99		131.962	6.03804	0.0447325	36.4579		107.472	30.5279	0.248728	931.954	2.1318	54.5635	6579.33	10800.3	13.3573	1.02071		90.4968	47.5032	0.415789	2256.56	1.64097	0.665	13.3573	516.718		77.0857	60.9143	0.566419
106	S31	60	100	44	49.2	1.61	0.5	670	50	0.5	98	Training data	Yaseen [38]	Pl		88.5784	88.3713	9.42165	0.100994	88.7674		123.78	25.7798	0.232481	664.597		102.343	4.34264	0.0433522	18.8586	2.04817	49.4375	7239.23	10408	14.4704	0.184335		87.8142	10.1858	0.109635	103.751	0.296353	0.125	14.4704	758.681		70.9536	27.0464	0.320164
107	S32	60	100	44	49.2	1.61	0.5	670	67	0.5	100	Training data	Yaseen [38]	Pl		88.5784	88.3713	11.4216	0.121134	130.454		123.78	23.7798	0.212528	565.478		102.985	2.98538	0.0294148	8.91252	2.04817	49.5183	7239.23	10408	14.4704	0.247009		88.757	11.243	0.119127	126.405	0.397113	0.1675	14.4704	739.638		71.3507	28.6493	0.334393
108	S33	60	100	44	52.8	1.61	0.5	670	83	0.5	117.5	Training data	Yaseen [38]	Pl		90.6057	90.331	26.8943	0.258468	723.304		131.521	14.0205	0.112606	196.576		100.552	16.9483	0.155452	287.244	2.12178	53.1942	6653.45	10755.8	13.4838	0.316994		90.5541	26.9459	0.259028	726.082	0.509626	0.2075	13.4837	721.715		74.7169	42.7831	0.445154
109	S34	60	100	44	49.5	1.61	0.5	670	100	0.5	110	Training data	Yaseen [38]	Pl		88.7482	88.5356	21.2518	0.213856	451.637		124.425	14.4248	0.123066	208.076		103.966	6.03356	0.0563972	36.4038	2.0544	49.975	7186.61	10438.9	14.3827	0.369792		90.2305	19.7695	0.197467	390.832	0.59451	0.25	14.3827	702.671		72.2195	37.7805	0.414671
110	S41	60	75	44	51.1	1.61	0.5	670	133	0.5	88.5	Training data	Yaseen [38]	Pl		82.4401	82.2046	6.05987	0.0709005	36.722		102.946	14.4463	0.150917	208.695		83.23	5.27	0.0613754	27.7729	2.08734	51.7317	5524.88	9094.27	13.9323	0.499709		80.459	8.04099	0.0951827	64.6575	0.803376	0.3325	13.9323	583.992		58.9459	29.5541	0.40088
111	S42	60	150	44	50.8	1.61	0.5	670	133	0.5	135	Training data	Yaseen [38]	Pl		106.713	106.459	28.2866	0.234051	800.131		177.058	42.058	0.269552	1768.87		145.471	10.4713	0.074669	109.647	2.0812	51.4317	9769.88	13567.2	14.0146	0.49824		114.07	20.9297	0.168063	438.053	0.801014	0.3325	14.0146	829.13		103.931	31.0688	0.260065
112	S1	60	100	45	43.3	1.84	0	550	0	0	86.5	Training data	Narayanan and Darwish [27]	0		81.3109	81.235	5.18914	0.0618451	26.9271		132.851	46.3508	0.422618	2148.39		100.919	14.4188	0.153867	207.902	1.92144	43.3	8035.14	10401.6	15.776	0		81.6283	4.87172	0.0579524	23.7337	0	0	15.776	824.116		67.4199	19.0801	0.247923
113	S2	60	100	45	52.1	1.84	0.25	550	100	0.75	93.4	Training data	Narayanan and Darwish [27]	C		94.5002	94.2457	1.10023	0.0117108	1.21051		140.833	47.4327	0.405005	2249.86		94.7959	1.39593	0.0148348	1.94861	2.10767	52.4563	6435.84	11350	13.1113	0.18969		88.6284	4.77158	0.0524268	22.768	0.457443	0.1875	13.1113	739.129		76.9636	16.4364	0.192956
114	S3	60	100	45	44.7	1.84	0.5	550	100	0.75	102	Training data	Narayanan and Darwish [27]	C		92.0014	91.8924	9.9986	0.103078	99.9719		123.876	21.8757	0.193697	478.547		103.366	1.36592	0.0133023	1.86573	1.95226	45.4125	7731.15	10577.4	15.2819	0.351406		88.3501	13.6499	0.143419	186.321	0.847426	0.375	15.2819	654.142		71.3194	30.6806	0.354035
115	S4	60	100	45	46	1.84	0.75	550	100	0.75	107.5	Training data	Narayanan and Darwish [27]	C		94.941	94.8043	12.559	0.124076	157.729		125.213	17.7133	0.152233	313.762		104.109	3.39083	0.032048	11.4977	1.98044	47.0688	7468.22	10731.1	14.85	0.534719		88.0171	19.4829	0.199296	379.582	1.28949	0.5625	14.85	569.155		73.1779	34.3221	0.379926
117	S6	60	100	45	53	1.84	1.25	550	100	0.75	122.2	Training data	Narayanan and Darwish [27]	C		104.619	104.339	17.5807	0.15502	309.083		141.32	19.1203	0.145114	365.585		102.848	19.3523	0.171984	374.51	2.12579	54.7812	6306.67	11429.2	12.8887	0.956606		81.8241	40.3759	0.395796	1630.22	2.30688	0.9375	12.8887	399.181		80.4133	41.7867	0.412477
118	S7	60	100	45	47	1.6	1	550	100	0.75	92.6	Training data	Narayanan and Darwish [27]	C		95.731	95.5743	3.13098	0.0332497	9.80303		119.972	27.3722	0.257533	749.237		90.5698	2.03023	0.0221678	4.12185	2.00185	48.425	6162.22	11518.3	12.6383	0.720666		80.6409	11.9591	0.138063	143.02	1.73791	0.75	12.6383	484.168		72.9861	19.6139	0.236902
119	S8	60	100	45	45.3	2.08	1	550	100	0.75	111.1	Training data	Narayanan and Darwish [27]	C		98.4571	98.3311	12.6429	0.120663	159.843		128.274	17.1737	0.143488	294.935		122.466	11.3664	0.0973292	129.195	1.96531	46.725	8832.25	9949.4	17.0464	0.707513		87.2334	23.8666	0.240672	569.615	1.70619	0.75	17.0464	484.168		74.3982	36.7018	0.395711
120	S9	60	100	45	43.5	2.3	1	550	100	0.75	111.3	Training data	Narayanan and Darwish [27]	C		98.7488	98.6573	12.5512	0.119508	157.534		128.734	17.4343	0.145265	303.953		140.056	28.7564	0.22881	826.933	1.92587	44.925	10521.9	9030.06	19.6293	0.693314		89.3146	21.9854	0.21918	483.357	1.67195	0.75	19.6293	484.168		73.8389	37.4611	0.404681
121	S10	60	100	45	47.6	2.53	1	550	100	0.75	111.3	Training data	Narayanan and Darwish [27]	C		104.153	103.978	7.14653	0.0663394	51.0729		143.509	32.2093	0.252811	1037.44		150.28	38.9797	0.298033	1519.42	2.01459	49.025	10591.3	8993.37	19.7324	0.725252		96.5373	14.7627	0.142061	217.939	1.74897	0.75	19.7324	484.168		79.0565	32.2435	0.33877
122	S11	60	100	45	29.8	1.84	1	550	100	0.75	82.1	Training data	Narayanan and Darwish [27]	C		84.4625	84.6485	2.36252	0.0283679	5.58148		84.5968	2.49683	0.0299566	6.23417		128.88	46.78	0.443454	2188.37	1.59401	31.225	12810.5	7857.82	22.9228	0.573844		69.1091	12.9909	0.171827	168.763	1.38384	0.75	22.9228	484.168		57.0646	25.0354	0.359796
123	S12	60	100	45	32.4	1.84	1	550	100	0.75	84.9	Training data	Narayanan and Darwish [27]	C		86.5394	86.6733	1.63941	0.0191253	2.68767		90.9489	6.04891	0.0687967	36.5893		123.645	38.7446	0.371571	1501.14	1.66209	33.825	11513.8	8512.54	21.0833	0.598354		71.8503	13.0497	0.166503	170.294	1.44295	0.75	21.0833	484.168		59.9313	24.9687	0.344796
124	t100-0.67	100	100	70	24.6	0.85	0.67	377	48	1	137.5	Training data	Higashiyama et al. [29]	H		120.541	121.777	16.9589	0.131444	287.605		120.009	17.4915	0.135852	305.952		54.4573	83.0427	0.86522	6896.09	1.44827	25.211	6767.57	24925.4	13.6777	0.167675		80.4349	57.0651	0.52369	3256.43	0.539138	0.3216	13.6777	872.29		78.8383	58.6617	0.542315
125	t140-0.67	140	100	110	24.6	0.54	0.67	377	48	1	210.2	Training data	Higashiyama et al. [29]	H		212.104	215.865	1.90402	0.00901727	3.62528		204.251	5.94894	0.0287076	35.3899		53.4455	156.754	1.18913	24572	1.44827	25.211	6754.02	55991	13.6548	0.167675		145.443	64.7573	0.36417	4193.5	0.539138	0.3216	13.6548	1182.6		138.431	71.7686	0.411717
126	t180-0.67	180	100	150	24.6	0.4	0.67	377	48	1	297.6	Training data	Higashiyama et al. [29]	H		332.83	340.377	35.2299	0.111765	1241.15		274.161	23.439	0.0819889	549.387		56.6751	240.925	1.3601	58044.8	1.44827	25.211	6835.42	98035.2	13.7927	0.167675		230.221	67.3785	0.255308	4539.86	0.539138	0.3216	13.7927	1492.91		212.983	84.6169	0.331452
127	t100-0.72	100	100	65	42.4	0.91	0.72	377	48	1	140.8	Training data	Higashiyama et al. [29]	H		132.83	133.318	7.96951	0.0582501	63.513		148.427	7.62728	0.0527425	58.1754		45.7326	95.0674	1.01931	9037.81	1.90137	43.0566	3586.89	24285	7.88899	0.23656		90.7243	50.0757	0.432574	2507.58	0.76063	0.3456	7.88899	820.135		100.647	40.1529	0.332602
128	t140-0.72	140	100	105	42.4	0.57	0.72	377	48	1	213.2	Training data	Higashiyama et al. [29]	H		248.224	250.764	35.0242	0.151809	1226.69		237.395	24.1949	0.107391	585.393		47.8386	165.361	1.26695	27344.4	1.90137	43.0566	3634.51	54701	7.98235	0.23656		173.999	39.2008	0.202484	1536.7	0.76063	0.3456	7.98235	1125.47		182.644	30.5563	0.154386
129	t180-0.72	180	100	145	42.4	0.41	0.72	377	48	1	290.7	Training data	Higashiyama et al. [29]	H		402.688	408.537	111.988	0.323017	12541.4		306.865	16.1653	0.0541039	261.317		53.2639	237.436	1.38059	56375.9	1.90137	43.0566	3607.28	96282.1	7.929	0.23656		283.069	7.63063	0.0265983	58.2265	0.76063	0.3456	7.929	1430.8		285.296	5.40416	0.0187646
130	t100-0.91	100	100	65	21.6	0.91	0.91	377	48	1	120.8	Training data	Higashiyama et al. [29]	H		109.211	110.307	11.5892	0.100771	134.31		99.3168	21.4832	0.195199	461.53		58.8885	61.9115	0.689098	3833.03	1.35709	22.4299	7856.2	21054.7	15.4858	0.2134		74.6919	46.1081	0.471714	2125.96	0.686161	0.4368	15.4858	769.342		67.8948	52.9052	0.560749
131	t140-0.91	140	100	105	21.6	0.57	0.91	377	48	1	183.1	Training data	Higashiyama et al. [29]	H		195.48	198.992	12.3797	0.0654006	153.256		192.351	9.25055	0.0492771	85.5727		58.7926	124.307	1.02779	15452.3	1.35709	22.4299	7969.08	50367	15.6691	0.2134		144.353	38.7473	0.236659	1501.36	0.686161	0.4368	15.6691	1055.77		122.999	60.1006	0.392687
132	t180-0.91	180	100	145	21.6	0.41	0.91	377	48	1	231.2	Training data	Higashiyama et al. [29]	H		310	317.193	78.8005	0.291206	6209.51		265.948	34.7482	0.13979	1207.44		62.0807	169.119	1.15329	28601.3	1.35709	22.4299	7904.52	90918.8	15.5643	0.2134		235.891	4.69127	0.0200872	22.008	0.686161	0.4368	15.5643	1342.19		192.053	39.1471	0.184982
133	t100-0.63	100	100	70	27.8	0.85	0.63	377	48	1	152.3	Training data	Higashiyama et al. [29]	H		124.552	125.688	27.7477	0.200451	769.935		127.335	24.965	0.178554	623.252		51.7446	100.555	0.985622	10111.4	1.53959	28.3746	5856.51	25622.2	12.1033	0.167606		82.5229	69.7771	0.594296	4868.84	0.538916	0.3024	12.1033	883.481		84.6029	67.6971	0.571518
134	t100-0.94	100	100	70	31.1	0.85	0.94	377	48	1	147.9	Training data	Higashiyama et al. [29]	H		133.248	134.276	14.6521	0.10423	214.683		134.784	13.1156	0.0927935	172.02		51.8968	96.0032	0.961008	9216.61	1.62841	31.9573	5138.79	26190.5	10.8191	0.264505		96.2189	51.6811	0.42341	2670.94	0.850484	0.4512	10.8191	796.752		91.885	56.015	0.46721
135	t100-1.03	100	100	70	30.4	0.85	1.03	377	48	1	158.9	Training data	Higashiyama et al. [29]	H		133.423	134.472	25.4769	0.174307	649.073		133.125	25.7748	0.176525	664.341		52.8865	106.013	1.00114	11238.9	1.60998	31.3394	5276.23	26080.3	11.0682	0.28655		97.5532	61.3468	0.478425	3763.43	0.921366	0.4944	11.0682	771.573		90.9592	67.9408	0.543833
136	S1	120	200	100	17.4	0.98	0	500	45	0	255	Training data	Wang et al. [39]	S		229.448	232.398	25.5519	0.105489	652.898		298.721	43.7208	0.157917	1911.51		243.531	11.4689	0.0460109	131.537	1.21803	17.4	46158.5	43116.8	42.2414	0		185.705	69.2952	0.314474	4801.82	0	0	42.2414	1742.48		161.846	93.1537	0.446945
138	S3	120	200	100	20.2	0.98	1.5	500	45	0.5	315	Training data	Wang et al. [39]	S		271.887	274.846	43.1132	0.146922	1858.74		322.351	7.35145	0.0230688	54.0438		241.577	73.4228	0.263837	5390.9	1.31238	20.8412	38283.9	47487.7	36.3861	0.318908		217.416	97.5837	0.366569	9522.58	0.512703	0.3375	36.3861	1419.03		193.369	121.631	0.478516
139	S4	120	200	100	15	0.98	1	500	45	0.5	285	Training data	Wang et al. [39]	S		245.882	249.075	39.1178	0.147369	1530.2		305.087	20.0873	0.0680825	403.5		273.884	11.1162	0.0397801	123.571	1.13091	15.4275	55838.9	38071.5	49	0.183208		195.522	89.4782	0.372421	8006.35	0.29454	0.225	49	1526.85		159.302	125.698	0.565822
140	S5	120	200	100	14.9	0.98	1.5	500	46	0.5	310	Training data	Wang et al. [39]	S		251.811	255.003	58.1892	0.207149	3385.98		308.212	1.78817	0.00578496	3.19753		279.876	30.1239	0.102136	907.448	1.12714	15.5555	56326.1	37826	49.3289	0.27998		196.516	113.484	0.448099	12878.7	0.450121	0.345	49.3289	1411.84		161.577	148.423	0.629475
142	c1	150	200	125	25	1.2	0.5	400	58	0.75	335	Training data	Abdel-Rahman et al. [40]	تابیده		374.935	379.721	39.9351	0.112504	1594.81		422.396	87.3961	0.23078	7638.08		257.283	77.7174	0.262433	6039.99	1.46	25.4133	37781.3	74148.1	36	0.152424		308.73	26.27	0.0816181	690.114	0.367575	0.2175	36	1741.47		290.768	44.2324	0.14137
143	c2	150	200	125	25	1.2	1	400	58	0.75	350	Training data	Abdel-Rahman et al. [40]	تابیده		391.663	396.435	41.6632	0.112351	1735.82		436.29	86.2899	0.219486	7445.95		268.931	81.0694	0.261966	6572.25	1.46	25.8265	37781.3	74148.1	36	0.304848		337.178	12.8218	0.0373173	164.399	0.73515	0.435	36	1504.84		301.175	48.8247	0.149959
144	c3	150	200	125	25	1.2	1.5	400	58	0.75	375	Training data	Abdel-Rahman et al. [40]	تابیده		408.391	413.149	33.3913	0.085248	1114.98		447.396	72.3956	0.17606	5241.12		280.565	94.4353	0.288104	8918.02	1.46	26.2398	37781.3	74148.1	36	0.457272		343.487	31.5133	0.0877214	993.091	1.10273	0.6525	36	1268.21		307.635	67.3654	0.197369
145	d1	150	200	125	25	1.2	0.5	400	58	0.75	345	Training data	Abdel-Rahman et al. [40]	تابیده		374.935	379.721	29.9351	0.0831606	896.112		422.396	77.3961	0.201711	5990.16		257.283	87.7174	0.291283	7694.34	1.46	25.4133	37781.3	74148.1	36	0.152424		308.73	36.27	0.110963	1315.51	0.367575	0.2175	36	1741.47		290.768	54.2324	0.170605
146	d2	150	200	125	25	1.2	1	400	58	0.75	369	Training data	Abdel-Rahman et al. [40]	تابیده		391.663	396.435	22.6632	0.059588	513.621		436.29	67.2899	0.16712	4527.93		268.931	100.069	0.313731	10013.9	1.46	25.8265	37781.3	74148.1	36	0.304848		337.178	31.8218	0.0901241	1012.63	0.73515	0.435	36	1504.84		301.175	67.8247	0.202409
147	d3	150	200	125	25	1.2	1.5	400	58	0.75	385	Training data	Abdel-Rahman et al. [40]	تابیده		408.391	413.149	23.3913	0.0589653	547.152		447.396	62.3956	0.149918	3893.21		280.565	104.435	0.313825	10906.7	1.46	26.2398	37781.3	74148.1	36	0.457272		343.487	41.5133	0.113971	1723.36	1.10273	0.6525	36	1268.21		307.635	77.3654	0.223394
148	F0_R0.75	150	200	136	55	0.75	0	534	0	0	385	Training data	Gouveia et al. [41]	تابیده		456.729	460.545	71.7294	0.170433	5145.11		421.825	36.8246	0.0912828	1356.05		152.386	232.614	0.865722	54109.1	2.16553	55	13413.2	105546	14.8549	0		246.623	138.377	0.438162	19148.1	0	0	14.8549	2081.77		448.286	63.286	0.151895
149	F0_R1.5	150	200	128	55.7	1.5	0	534	0	0	505	Training data	Gouveia et al. [41]	تابیده		473.907	477.028	31.0934	0.0635268	966.799		460.578	44.4222	0.0920117	1973.33		318.677	186.323	0.452419	34716.4	2.17927	55.7	27371.7	84680.3	27.6108	0		447.418	57.5817	0.120917	3315.65	0	0	27.6108	2006.37		463.571	41.4288	0.0855462
150	F1_R0.75	150	200	135	47.4	0.75	1	529	64	0.75	595	Training data	Gouveia et al. [41]	تابیده		529.868	534.23	65.1317	0.115803	4242.14		484.986	110.014	0.203732	12103.1		201.154	393.846	0.989372	155115	2.01035	48.312	15550.8	102441	16.9498	0.463185		465.286	129.714	0.244677	16825.7	1.11698	0.48	16.9498	1525.25		459.627	135.373	0.256722
151	F1_R1.5	150	200	128	45.4	1.5	1	529	64	0.75	674	Training data	Gouveia et al. [41]	تابیده		528.116	531.972	145.884	0.242712	21282.2		513.552	160.448	0.270217	25743.7		381.545	292.455	0.55413	85529.7	1.96748	46.312	34650.2	79664	33.5577	0.453308		544.227	129.773	0.213051	16840.9	1.09317	0.48	33.5577	1476.69		459.228	214.772	0.379045
152	F1.5_R1.5	150	200	128	46.1	1.5	1.5	529	64	0.75	708	Training data	Gouveia et al. [41]	تابیده		564.12	567.909	143.88	0.226206	20701.5		531.77	176.23	0.284296	31057.2		396.737	311.263	0.563506	96884.6	1.98259	47.468	34007.3	80093.8	33.0482	0.685184		539.597	168.403	0.269964	28359.6	1.65234	0.72	33.0482	1211.85		473.372	234.628	0.397213
154	S80-1-1.0	80	100	64	31.4	1	1	350	48	0.75	129.7	Training data	Eltahawy et al. [42]	تابیده		119.494	120.238	10.206	0.0819123	104.163		125.755	3.94504	0.0308863	15.5633		52.0523	77.6477	0.854434	6029.16	1.63624	32.084	5073.76	22479.5	10.7006	0.282743		81.0097	48.6903	0.462155	2370.74	0.681842	0.36	10.7006	804.556		81.9388	47.7612	0.451347
155	S80-1.5-1.0	80	100	64	26	1	1.5	350	48	0.75	139.3	Training data	Eltahawy et al. [42]	تابیده		117.158	118.05	22.1419	0.172674	490.262		110.661	28.6385	0.229144	820.166		58.1466	81.1534	0.822029	6585.87	1.48891	27.026	6326.58	21542.2	12.9231	0.385926		82.299	57.001	0.514452	3249.11	0.930673	0.54	12.9231	705.241		74.1653	65.1347	0.61026
156	S80-1-0.7	80	100	64	31.4	0.7	1	350	48	0.75	106	Training data	Eltahawy et al. [42]	تابیده		116.107	116.853	10.1067	0.0910078	102.146		94.9551	11.0449	0.109924	121.99		36.8907	69.1093	0.967304	4776.1	1.63624	32.084	3385	23833.5	7.49045	0.282743		71.7686	34.2314	0.385123	1171.79	0.681842	0.36	7.49045	804.556		77.9474	28.0526	0.305007
157	S80-1.5-0.7	80	100	64	26	0.7	1.5	350	48	0.75	107.8	Training data	Eltahawy et al. [42]	تابیده		114.353	115.248	6.55341	0.0589989	42.9471		79.8581	27.9419	0.297796	780.751		41.4518	66.3482	0.889077	4402.08	1.48891	27.026	4185.56	23177.3	9.04615	0.385926		75.63	32.17	0.35076	1034.91	0.930673	0.54	9.04615	705.241		70.5334	37.2666	0.417944
158	S60-0-1.5	60	100	44	26.5	1.5	0	350	0	0	75.2	Training data	Eltahawy et al. [42]	تابیده		69.2977	69.5005	5.90235	0.0816947	34.8377		96.084	20.884	0.243853	436.143		56.5031	18.6969	0.283925	349.575	1.50316	26.5	6415	10899.7	13.0755	0		40.9321	34.2679	0.590153	1174.29	0	0	13.0755	814.691		47.6495	27.5505	0.448524
159	S60-1-1.5	60	100	44	31.4	1.5	1	350	48	0.75	97.1	Training data	Eltahawy et al. [42]	تابیده		81.9415	82.0742	15.1585	0.169329	229.78		75.0166	22.0834	0.25661	487.676		55.8192	41.2808	0.539903	1704.1	1.63624	32.084	5257.89	11618.8	11.035	0.282743		53.8286	43.2714	0.573403	1872.42	0.681842	0.36	11.035	653.382		54.5882	42.5118	0.560515
160	S60-1-2.2	60	100	44	31.4	2.2	1	350	48	0.75	90.5	Training data	Eltahawy et al. [42]	تابیده		85.7432	85.8726	4.75685	0.0539805	22.6276		93.3056	2.80559	0.0305278	7.87132		85.9155	4.58453	0.0519743	21.0179	1.63624	32.084	8289.16	9803.78	16.1847	0.282743		65.8674	24.6326	0.315061	606.766	0.681842	0.36	16.1847	653.382		58.115	32.385	0.435825
161	F09-00	150	200	117	80	0.9	0	585	0	0	381.7	Training data	Chanthabouala et al. [7]	H		428.348	429.603	46.648	0.115174	2176.04		426.415	44.7149	0.110665	1999.42		158.128	223.572	0.828311	49984.7	2.61173	80	10164.6	84929.9	11.5501	0		254.926	126.774	0.398268	16071.6	0	0	11.5501	1902.7		477.214	95.514	0.222406
162	F09-03	150	200	117	89	0.9	0.3	585	67	1	461	Training data	Chanthabouala et al. [7]	H		517.102	517.99	56.102	0.114716	3147.44		493.416	32.4164	0.0679293	1050.82		167.522	293.478	0.933867	86129.4	2.75472	89.3819	9052.66	85870.6	10.3821	0.199332		392.118	68.8825	0.161484	4744.79	0.640926	0.201	10.3821	1692.36		554.272	93.2717	0.183737
163	F09-06	150	200	117	87	0.9	0.6	585	67	1	556	Training data	Chanthabouala et al. [7]	H		543.348	544.313	12.6518	0.023017	160.069		512.126	43.8745	0.0821523	1924.97		183.471	372.529	1.00756	138778	2.72359	87.7638	9278.33	85678.4	10.6208	0.394159		484.286	71.7135	0.137873	5142.83	1.26737	0.402	10.6208	1482.01		569.314	13.3141	0.023663
164	F09-09	150	200	117	90	0.9	0.9	585	67	1	678	Training data	Chanthabouala et al. [7]	H		584.451	585.232	93.5495	0.148203	8751.51		537	141	0.232099	19881		197.496	480.504	1.09767	230884	2.77016	91.1457	8943.86	85963.5	10.2668	0.601345		545.669	132.331	0.216286	17511.6	1.93355	0.603	10.2668	1271.67		594.979	83.0208	0.130435
165	F09-12	150	200	117	100	0.9	1.2	585	67	1	731	Training data	Chanthabouala et al. [7]	H		652.679	652.909	78.3208	0.113207	6134.14		577.931	153.069	0.233883	23430		211.095	519.905	1.10372	270301	2.92	101.528	7983.74	86790.4	9.24008	0.845165		586.64	144.36	0.219119	20839.8	2.71752	0.804	9.24008	1061.33		644.232	86.7679	0.126186
166	F14-00	150	200	114	80	1.4	0	575	0	0	382.3	Training data	Chanthabouala et al. [7]	H		453.512	454.572	71.212	0.170402	5071.16		453.748	71.448	0.170918	5104.82		247.669	134.631	0.427422	18125.5	2.61173	80	15817.3	76951.5	17.2069	0		374.135	8.1648	0.0215876	66.664	0	0	17.2069	1874.43		492.476	110.176	0.251895
168	F14-06	150	200	114	87	1.4	0.6	575	67	1	587	Training data	Chanthabouala et al. [7]	H		571.48	572.241	15.5197	0.0267932	240.861		537.165	49.8347	0.0886608	2483.5		267.44	319.56	0.747999	102119	2.72359	87.7638	14392.8	78052.2	15.8224	0.394159		551.191	35.8089	0.0629224	1282.28	1.26737	0.402	15.8224	1459.99		582.842	4.15781	0.00710833
169	F14-09	150	200	114	90	1.4	0.9	575	67	1	806	Training data	Chanthabouala et al. [7]	H		612.26	612.842	193.74	0.273208	37535.2		561.531	244.469	0.357533	59765		279.037	526.963	0.971326	277690	2.77016	91.1457	13857.2	78471.5	15.295	0.601345		591.956	214.044	0.306224	45814.7	1.93355	0.603	15.295	1252.77		608.239	197.761	0.279671
170	F14-12	150	200	114	100	1.4	1.2	575	67	1	977	Training data	Chanthabouala et al. [7]	H		682.823	682.862	294.177	0.354468	86540.3		602.035	374.965	0.474929	140598		287.636	689.364	1.09022	475223	2.92	101.528	12325.6	79687.4	13.7655	0.845165		615.954	361.046	0.453304	130354	2.71752	0.804	13.7655	1045.56		657.68	319.32	0.390682
171	S0	60	55	45	53	0.94	0	477	0	0	79.63	Training data	Arna’ot et al. [43]	H		66.9055	66.6745	12.7245	0.173672	161.914		69.8571	9.77285	0.130752	95.5086		21.6059	58.0241	1.14632	3366.8	2.12579	53	1482.3	10448.1	5.7105	0		28.2672	51.3628	0.95207	2638.14	0	0	5.7105	644.116		43.3108	36.3192	0.59084
172	S075	60	55	45	51	0.94	0.75	477	54.5	1	78.8	Training data	Arna’ot et al. [43]	H		78.9	78.6779	0.0999573	0.00126769	0.00999146		59.7318	19.0682	0.275289	363.595		24.8744	53.9256	1.04029	2907.97	2.0853	51.7766	1549.63	10388.5	5.93444	0.306851		49.4331	29.3669	0.458024	862.414	0.986642	0.40875	5.93444	499.311		44.5999	34.2001	0.554298
173	S1.25	60	55	45	59	0.94	1.25	477	54.5	1	93.28	Training data	Arna’ot et al. [43]	H		88.7507	88.3602	4.52932	0.0497644	20.5148		79.6428	13.6372	0.157726	185.974		25.9456	67.3344	1.12953	4533.92	2.24289	60.2944	1310.91	10602.5	5.12977	0.55007		58.2916	34.9884	0.461675	1224.19	1.76868	0.68125	5.12977	402.774		49.2633	44.0167	0.61759
174	ND0	125	200	105	44.8	1	0	594	0	0	289.2	Training data	Gouveia et al. [44]	H		305.881	308.015	16.6813	0.056064	278.267		353.2	63.9997	0.199252	4095.96		205.57	83.6295	0.338054	6993.89	1.95444	44.8	19728.4	64250.8	20.8828	0		242.768	46.4317	0.174566	2155.9	0	0	20.8828	1789.6		300.689	11.4892	0.0389536
175	ND1	125	200	105	42.2	1	0.5	594	63.6	1	296	Training data	Gouveia et al. [44]	H		347.57	350.021	51.5702	0.160263	2659.49		378.192	82.1915	0.243822	6755.45		224.129	71.8707	0.276357	5165.4	1.89688	42.8042	21141.5	63268.1	22.1694	0.217154		322.429	26.4291	0.0854717	698.496	0.698232	0.318	22.1694	1476.6		316.845	20.8451	0.0680272
176	ND2	125	200	105	39.8	1	0.75	594	63.6	1	369.3	Training data	Gouveia et al. [44]	H		350.64	353.195	18.66	0.0518377	348.197		379.726	10.4263	0.0278395	108.707		235.54	133.76	0.442298	17891.7	1.84215	40.7063	22634.2	62246.9	23.5063	0.316334		335.553	33.7473	0.095757	1138.88	1.01713	0.477	23.5063	1320.1		311.857	57.4429	0.168663
177	ND3	125	200	105	57.7	1	0.75	594	63.6	1	450.7	Training data	Gouveia et al. [44]	H		402.404	404.117	48.2956	0.113223	2332.46		421.06	29.6403	0.068001	878.546		209.493	241.207	0.730715	58180.6	2.21805	58.6063	14793.1	67816.9	16.214	0.380883		384.341	66.359	0.158936	4403.52	1.22468	0.477	16.214	1320.1		389.802	60.8975	0.144907
178	ND4	125	200	105	57.2	1	1	594	63.6	1	456	Training data	Gouveia et al. [44]	H		414.895	416.62	41.105	0.094397	1689.62		428.043	27.9573	0.0632488	781.613		217.878	238.122	0.706721	56702.1	2.20842	58.4084	14938.5	67708.7	16.3558	0.505639		397.655	58.3448	0.136694	3404.12	1.62582	0.636	16.3558	1163.6		392.996	63.0039	0.14842
179	ND5	125	200	105	55.6	1	1.25	594	63.6	1	474.7	Training data	Gouveia et al. [44]	H		423.516	425.305	51.1836	0.113967	2619.76		431.232	43.4684	0.095964	1889.5		227.191	247.509	0.705262	61260.5	2.17731	57.1105	15423.2	67349.2	16.8264	0.623146		391.048	83.6523	0.193249	6997.7	2.00365	0.795	16.8264	1007.1		390.098	84.6021	0.195658
180	Cf0fc50	150	200	126	50	0.85	0	530	0	0	409.11	Training data	Ju et al. [9]	H		401.759	405.066	7.35112	0.0181315	54.0389		401.396	7.71448	0.0190362	59.5133		168.745	240.365	0.831921	57775.3	2.06475	50	15632.7	91164.1	17.0289	0		245.379	163.731	0.500333	26807.9	0	0	17.0289	1987.52		391.829	17.2808	0.0431513
181	Cf60fc50	150	200	130	70	0.8	0	530	0	0	386.08	Training data	Ju et al. [9]	H		468.878	471.44	82.7979	0.193689	6855.5		434.683	48.6035	0.118435	2362.3		142.993	243.087	0.918915	59091.1	2.44305	70	10415.9	100513	11.8114	0		242.796	143.284	0.455683	20530.3	0	0	11.8114	2025.22		493.821	107.741	0.244893
183	Cf90fc50	150	200	133	70	0.77	0.764331	530	67.2	1	456.53	Training data	Ju et al. [9]	H		604.451	607.401	147.921	0.278839	21880.7		523.185	66.6554	0.136071	4442.94		181.608	274.922	0.861637	75581.9	2.44305	70.9759	10242.1	104480	11.6309	0.451737		545.37	88.8403	0.177344	7892.61	1.4525	0.513631	11.6309	1473.39		583.071	126.541	0.243441
184	Cf0fc70	150	200	129	50	0.81	0.955414	530	67.2	1	399.15	Training data	Ju et al. [9]	H		516.46	520.254	117.31	0.256245	13761.7		476.147	76.9975	0.175934	5928.61		204.369	194.781	0.645483	37939.6	2.06475	51.2199	15204	95189.3	16.6139	0.477234		478.64	79.4897	0.181113	6318.61	1.53448	0.642038	16.6139	1303.98		465.93	66.7805	0.154391
185	Cf60fc70	150	200	128	70	0.82	0.955414	530	67.2	1	462.03	Training data	Ju et al. [9]	H		593.5	596.063	131.47	0.249107	17284.3		522.213	60.183	0.122293	3621.99		194.081	267.949	0.816781	71796.9	2.44305	71.2199	10521.1	97915.4	11.9205	0.564671		548.193	86.1631	0.170582	7424.08	1.81563	0.642038	11.9205	1297.88		566.824	104.794	0.20371
186	Cf75fc70	150	200	118	50	0.95	1.1465	530	67.2	1	496.34	Training data	Ju et al. [9]	H		472.188	475.121	24.1517	0.0498731	583.306		457.892	38.4484	0.0805851	1478.28		223.294	273.046	0.758847	74554.1	2.06475	51.4638	16460.7	81029.4	17.8239	0.572681		433.041	63.2993	0.136218	4006.8	1.84138	0.770446	17.8239	1101.87		429.201	67.1389	0.14508
187	Cf90fc70	150	200	117	70	0.96	1.1465	530	67.2	1	495.58	Training data	Ju et al. [9]	H		543.912	545.718	48.3321	0.0929917	2335.99		505.393	9.81293	0.0196068	96.2936		210.586	284.994	0.807157	81221.4	2.44305	71.4638	11332.8	83958.4	12.7563	0.677605		498.069	2.4893	0.00501041	6.1966	2.17875	0.770446	12.7563	1096.44		521.379	25.7995	0.0507385
188	S1	125	130	105	36.4	1.3	0	529.7	0	0	290.1	Training data	Zamri et al. [46]	H		236.929	239.472	53.171	0.201776	2827.16		295.341	5.24066	0.0179033	27.4645		193.612	96.4877	0.398947	9309.89	1.76171	36.4	21646	46914.4	29.7956	0		237.402	52.6977	0.199801	2777.05	0	0	29.7956	1509.6		200.14	89.9597	0.367002
190	S3	125	130	105	48.6	1.3	0.75	529.7	60.3	1	412.1	Training data	Zamri et al. [46]	H		323.523	325.719	88.577	0.240822	7845.89		354.313	57.7866	0.150798	3339.29		182.764	229.336	0.771052	52594.9	2.03564	49.4593	15055.5	51580.3	22.3161	0.331423		321.249	90.8508	0.24777	8253.87	1.06565	0.45225	22.3161	1134.11		263.604	148.496	0.439529
191	S4	125	130	105	45.1	1.3	0.75	529.7	60.3	1	354.9	Training data	Zamri et al. [46]	H		312.318	314.679	42.5823	0.127641	1813.25		346.231	8.6686	0.0247275	75.1446		188.42	166.48	0.612824	27715.5	1.96097	45.9593	16512.5	50499.9	24.0479	0.319266		313.124	41.7757	0.125072	1745.21	1.02656	0.45225	24.0479	1134.11		252.099	102.801	0.338721
192	S5	125	130	105	43.3	1.3	0.75	529.7	60.3	1	365.6	Training data	Zamri et al. [46]	H		306.493	308.94	59.1067	0.175888	3493.6		342.075	23.525	0.0664854	553.427		191.699	173.901	0.624087	30241.7	1.92144	44.1593	17372.5	49876.3	25.0476	0.31283		308.777	56.8233	0.168521	3228.89	1.00586	0.45225	25.0476	1134.11		246.045	119.555	0.390928
193	S6	100	130	80	42.5	1.6	0.75	529.7	60.3	1	222.3	Training data	Zamri et al. [46]	H		211.72	212.789	10.5797	0.0487521	111.93		264.441	42.1408	0.173155	1775.84		185.836	36.4644	0.178688	1329.65	1.90361	43.3593	16412	30120.8	23.93	0.309926		217.615	4.68473	0.0212983	21.9467	0.996529	0.45225	23.93	957.096		174.163	48.1369	0.242832
194	SFRC1_1	35	100	21.805	46.2	0.87	0.31	560	60	1	21.4	Training data	Tan and Paramasivam [47]	H		48.9748	48.6481	27.5748	0.783656	760.371		8.49266	12.9073	0.863579	166.599		23.7512	2.35125	0.10415	5.52838	1.98474	46.5534	1462.11	5058.03	3.44915	0.132898		18.6565	2.74352	0.136983	7.52692	0.427317	0.186	3.44915	543.564		27.85	6.45	0.261929
195	SFRC1_2	35	100	21.805	45.8	0.87	0.31	560	60	1	22.6	Training data	Tan and Paramasivam [47]	H		48.9264	48.6038	26.3264	0.736131	693.08		7.69271	14.9073	0.984216	222.227		23.8131	1.21311	0.0522746	1.47164	1.97613	46.1534	1475.6	5049.73	3.47928	0.132322		18.6201	3.97994	0.193107	15.8399	0.425464	0.186	3.47928	543.564		27.706	5.10603	0.202999
196	SFRC1_3	35	100	21.805	47.2	0.87	0.31	560	60	1	18.9	Training data	Tan and Paramasivam [47]	H		49.0955	48.7584	30.1955	0.888161	911.765		10.4925	8.40745	0.572081	70.6853		23.6002	4.7002	0.221185	22.0919	2.00611	47.5534	1429.42	5078.17	3.37608	0.134329		18.7466	0.153359	0.00814729	0.023519	0.431917	0.186	3.37608	543.564		28.2078	9.30779	0.39517
197	SFRC2_1	35	100	21.805	40.3	0.87	0.5	560	60	1	20.9	Training data	Tan and Paramasivam [47]	H		48.6049	48.3389	27.7049	0.797207	767.56		-8.94854	29.8485	2	890.936		25.1448	4.24475	0.184375	18.0179	1.85368	40.87	1690	4918.89	3.95412	0.200198		19.9902	0.909766	0.0444979	0.827674	0.64371	0.3	3.95412	505.599		25.8347	4.93472	0.21118
199	SFRC2_3	35	100	21.805	39.7	0.87	1.5	560	60	1	24.6	Training data	Tan and Paramasivam [47]	H		50.364	50.1028	25.764	0.68737	663.784		-28.1894	52.7894	2	2786.72		27.2687	2.6687	0.102902	7.12195	1.83983	41.41	1717.2	4902.42	4.01388	0.596105		21.9763	2.62371	0.112663	6.88386	1.9167	0.9	4.01388	305.781		26.0002	1.40019	0.0553431
200	SFRC2_4	35	100	21.805	47.8	0.87	2	560	60	1	27.4	Training data	Tan and Paramasivam [47]	H		52.9105	52.5641	25.5105	0.635297	650.787		-11.1014	38.5014	2	1482.35		27.1901	0.209875	0.00768913	0.0440476	2.01882	50.08	1410.5	5089.85	3.3337	0.872129		26.4785	0.921521	0.0342074	0.849201	2.80422	1	3.3337	272.478		29.1504	1.7504	0.0619059
201	SFRC3_1	22	100	13.706	46.9	0.87	0.31	560	60	1	9.4	Training data	Tan and Paramasivam [47]	H		40.1582	39.8659	30.7582	1.2413	946.064		-17.8165	27.2165	2	740.739		16.2726	6.87263	0.535405	47.233	1.99972	47.2534	885.881	2863.55	2.13568	0.133901		10.2834	0.883351	0.0897562	0.780309	0.430543	0.186	2.13568	475.042		16.9051	7.50509	0.570619
202	SFRC3_2	57	100	35.511	46.1	0.87	0.31	560	60	1	54.9	Training data	Tan and Paramasivam [47]	H		68.3711	68.1069	13.4711	0.21856	181.47		54.2	0.699956	0.0128314	0.489938		35.7217	19.1783	0.42326	367.806	1.98259	46.4534	2471.36	9653.13	5.62938	0.132754		36.8473	18.0527	0.393531	325.9	0.426855	0.186	5.62938	659.526		48.665	6.23505	0.120408
203	SFRC3_3	70	100	43.61	48.4	0.87	0.31	560	60	1	70.5	Training data	Tan and Paramasivam [47]	H		83.4729	83.2721	12.9729	0.168509	168.296		85.556	15.056	0.192957	226.685		41.9889	28.5111	0.506915	812.885	2.03145	48.7534	2934.38	12999.9	6.58475	0.136026		50.504	19.996	0.330501	399.84	0.437373	0.186	6.58475	728.049		64.1022	6.39776	0.0950617
205	SFRC4_2	35	100	21.805	60.6	0.87	0.31	560	60	1	20	Training data	Tan and Paramasivam [47]	H		50.6615	50.1858	30.6615	0.867842	940.13		37.291	17.291	0.60362	298.978		21.9639	1.96394	0.0936015	3.85708	2.2731	60.9534	1099.74	5283.88	2.62955	0.152207		19.8541	0.145916	0.00732251	0.0212915	0.489402	0.186	2.62955	543.564		32.7465	12.7465	0.483313
206	SFRC5_1	35	200	21.805	41.4	0.87	0.31	560	60	1	26.1	Training data	Tan and Paramasivam [47]	H		69.584	69.2859	43.484	0.908909	1890.86		86.5667	60.4667	1.07337	3656.23		47.4604	21.3604	0.580757	456.265	1.87881	41.7534	3181.91	8539.03	3.84906	0.125805		30.2318	4.13182	0.146696	17.0719	0.404511	0.186	3.84906	902.644		49.5852	23.4852	0.620602
207	SFRC5_2	35	150	21.805	39.8	0.87	0.31	560	60	1	18.7	Training data	Moreillon [48]	H		57.8963	57.6261	39.1963	1.02345	1536.35		39.5302	20.8302	0.715442	433.896		36.4233	17.7233	0.643042	314.115	1.84215	40.1534	2513.37	6685.32	4.00379	0.12335		24.0086	5.30855	0.248594	28.1807	0.396617	0.186	4.00379	723.104		36.9596	18.2596	0.656116
208	B1-01	120	120	90	99	0.84	0	504	0	0	262	Training data	Moreillon [48]	0		250.89	250.322	11.1095	0.0433212	123.421		306.134	44.1336	0.155363	1947.77		58.3852	203.615	1.27106	41459	2.90536	99	3002.05	46480.6	5.77309	0		110.074	151.926	0.816642	23081.4	0	0	5.77309	1328.23		263.76	1.75967	0.00669383
210	B1-06	120	120	88	99	1.24	0	531	0	0	252	Training data	Moreillon [48]	0		266.927	266.284	14.927	0.0575303	222.815		328.372	76.372	0.263183	5832.69		92.8642	159.136	0.922889	25324.2	2.90536	99	4748.14	43169	8.7792	0		165.015	86.9845	0.417177	7566.31	0	0	8.7792	1309.38		270.463	18.4626	0.0706751
211	B2-01	120	120	100	102	0.76	0.254777	504	80	1	318	Training data	Moreillon [48]	H		343.238	342.817	25.2383	0.0763365	636.972		375.382	57.3816	0.165512	3292.64		67.0961	250.904	1.30307	62952.8	2.94906	102.387	2923.7	55346.3	5.63294	0.216389		223.809	94.1907	0.347689	8871.88	0.695772	0.203822	5.63294	1263.02		327.027	9.02693	0.0279893
212	B3-01	120	120	90	102	0.84	0.509554	504	80	1	343	Training data	Moreillon [48]	H		315.311	314.538	27.6889	0.0841209	766.674		371.623	28.6229	0.0801062	819.268		75.4699	267.53	1.27861	71572.4	2.94906	102.775	2907.16	46574.3	5.60329	0.432779		258.449	84.5514	0.281159	7148.94	1.39154	0.407643	5.60329	1030.44		298.907	44.093	0.137381
213	B3-05	120	120	92	102	0.53	0.509554	528	80	1	286	Training data	Moreillon [48]	H		302.787	302.093	16.7866	0.0570209	281.789		320.76	34.7602	0.114576	1208.27		56.5126	229.487	1.34002	52664.5	2.94906	102.775	1916.65	49292.2	3.78607	0.432779		241.967	44.0333	0.166803	1938.93	1.39154	0.407643	3.78607	1045.06		291.889	5.88921	0.0203818
214	B3-06	120	120	88	102	1.24	0.509554	531	80	1	361	Training data	Moreillon [48]	H		332.388	331.536	28.6122	0.0825289	818.661		392.46	31.4597	0.0835073	989.712		108.41	252.59	1.0762	63801.9	2.94906	102.775	4593.24	43309.7	8.52099	0.432779		288.675	72.3246	0.222648	5230.85	1.39154	0.407643	8.52099	1015.81		304.771	56.2294	0.168915
215	B4-01	120	120	100	100	0.76	0.764331	504	80	1	344	Training data	Moreillon [48]	H		384.906	384.536	40.9064	0.11224	1673.33		407.179	63.1788	0.168212	3991.55		88.0874	255.913	1.18454	65491.3	2.92	101.162	2986.66	55280.2	5.7456	0.642772		341.644	2.356	0.00687237	5.55074	2.06675	0.611465	5.7456	944.092		341.143	2.85671	0.00833903
217	B5-05	120	120	92	106	0.53	1.01911	528	80	1	327	Training data	Moreillon [48]	H		349	348.11	21.9996	0.0650876	483.982		357.861	30.8609	0.090123	952.392		75.44	251.56	1.25017	63282.5	3.00632	107.549	1840.72	49372	3.6432	0.882366		307.967	19.0333	0.0599505	362.266	2.83713	0.815287	3.6432	743.04		309.157	17.8434	0.0560976
218	B5-06	120	120	88	106	1.24	1.01911	531	80	1	402	Training data	Moreillon [48]	H		376.719	375.679	25.2807	0.064929	639.115		428.421	26.4211	0.0636329	698.072		124.419	277.581	1.0546	77051.5	3.00632	107.549	4401.64	43484.9	8.19944	0.882366		324.855	77.1453	0.212272	5951.39	2.83713	0.815287	8.19944	722.245		321.656	80.3441	0.222051
219	BCV-2%-30-1.36	30	80	15	156	1.36	2	623	66.67	0.5	41.9	Training data	Moreillon [48]	S		50.2029	49.2018	8.30289	0.180296	68.938		279.091	237.191	1.47787	56259.5		21.6122	20.2878	0.638864	411.596	3.64708	157.267	401.401	2920.58	1.22204	1.75069		24.2802	17.6198	0.53248	310.458	2.81455	0.6667	1.22204	292.194		33.7733	8.12667	0.214783
220	BCV-2%-40-1.02	40	80	20	156	1.02	2	623	66.67	0.5	47.9	Training data	Moreillon [48]	S		61.5764	60.3191	13.6764	0.24985	187.043		284.195	236.295	1.42306	55835.3		22.5198	25.3802	0.720827	644.156	3.64708	157.267	401.401	4305.79	1.22204	1.75069		33.2409	14.6591	0.361326	214.89	2.81455	0.6667	1.22204	322.038		45.1238	2.77618	0.0596874
221	BCV-2%-60-1.00	60	80	40	156	1	2	585	66.67	0.5	120	Training data	Moreillon [48]	S		139.525	137.433	19.525	0.150467	381.226		365.074	245.074	1.01046	60061.1		42.3858	77.6142	0.955923	6023.96	3.64708	157.267	755.083	11272.2	2.25	1.75069		89.533	30.467	0.290808	928.237	2.81455	0.6667	2.25	441.415		102.491	17.5093	0.157393
222	BCV-2%-80-1.10	80	80	60	156	1.1	2	556	66.67	0.5	274	Training data	Moreillon [48]	S		267.601	264.965	6.39852	0.0236282	40.9411		452.416	178.416	0.491224	31832.4		68.2901	205.71	1.20196	42316.6	3.64708	157.267	1215.39	20775.9	3.52846	1.75069		172.22	101.78	0.456187	10359.2	2.81455	0.6667	3.52846	560.793		175.331	98.6691	0.439182
224	BCV-1%A-60-2.05	60	80	40	157	2.05	1	557	72.5714	0.5	130	Training data	Moreillon [48]	S		141.136	139.026	11.1362	0.082145	124.016		360.579	230.579	0.940028	53166.6		60.1617	69.8383	0.734514	4877.38	3.65875	157.689	1528.37	10641	4.36376	0.955874		99.1114	30.8886	0.269638	954.106	1.53675	0.362857	4.36376	557.892		111.535	18.4651	0.152898
225	BCV-1%A-80-1.10	80	80	60	157	1.1	1	556	72.5714	0.5	220	Training data	Moreillon [48]	S		220.489	217.867	0.488532	0.00221814	0.238664		405.779	185.779	0.593753	34513.9		53.8537	166.146	1.21339	27604.6	3.65875	157.689	1207.1	20784.1	3.50599	0.955874		144.562	75.4378	0.413854	5690.87	1.53675	0.362857	3.50599	708.77		172.635	47.3646	0.241265
226	BCV-1%A-30-2.67	30	80	15	150	2.67	1	585	72.5714	0.5	49.6	Training data	Moreillon [48]	S		50.6194	49.6572	1.01936	0.0203426	1.0391		260.733	211.133	1.36069	44577.1		34.8729	14.7271	0.348682	216.888	3.57626	150.689	787.777	2682.98	2.34293	0.934322		28.859	20.741	0.528711	430.191	1.5021	0.362857	2.34293	369.295		36.1185	13.4815	0.314553
227	BCV-1%A-80-1.96	80	80	60	150	1.96	1	504	72.5714	0.5	271	Training data	Moreillon [48]	S		254.046	251.57	16.9536	0.0645795	287.425		415.488	144.488	0.420948	20876.7		78.9152	192.085	1.09789	36896.6	3.57626	150.689	2140.1	19893.4	5.92704	0.934322		173.692	97.3076	0.43764	9468.77	1.5021	0.362857	5.92704	708.77		181.267	89.7335	0.396817
229	BCV-1%A-60-1.49	60	80	40	149	1.49	1	556	72.5714	0.5	118	Training data	Moreillon [48]	S		125.322	123.36	7.32238	0.0601866	53.6172		327.623	209.623	0.940809	43941.8		45.8284	72.1716	0.881063	5208.74	3.56431	149.689	1144.64	10947.9	3.336	0.931203		83.9994	34.0006	0.336641	1156.04	1.49708	0.362857	3.336	557.892		103.411	14.5892	0.131784
230	BCV-1%A-80-1.77	80	80	60	149	1.77	1	504	72.5714	0.5	268	Training data	Moreillon [48]	S		244.196	241.753	23.8037	0.0929474	566.614		408.838	140.838	0.416165	19835.4		72.443	195.557	1.14884	38242.6	3.56431	149.689	1925.5	20091.6	5.3884	0.931203		165.378	102.622	0.473594	10531.4	1.49708	0.362857	5.3884	708.77		178.01	89.9897	0.403532
231	BCV-2%-60-1.49	60	80	40	153	1.49	2	556	66.67	0.5	136	Training data	Moreillon [48]	S		148.342	146.293	12.3418	0.0868099	152.321		377.531	241.531	0.940668	58337.4		53.2246	82.7754	0.87489	6851.76	3.61184	154.267	1112.75	10973.9	3.24878	1.73377		96.4766	39.5234	0.340021	1562.1	2.78736	0.6667	3.24878	441.415		106.583	29.4167	0.242528
232	BCV-2%-80-1.77	80	80	60	153	1.77	2	504	66.67	0.5	274	Training data	Moreillon [48]	S		295.589	293.003	21.5888	0.0758049	466.077		466.464	192.464	0.519847	37042.4		86.0477	187.952	1.04404	35326.1	3.61184	154.267	1870.04	20143.4	5.24753	1.73377		187.672	86.3276	0.373977	7452.45	2.78736	0.6667	5.24753	560.793		184.171	89.8285	0.392117
234	S2C2	200	400	160	60.5	0.9	0.5	400	66.7	1	1139.5	Training data	Grimaldi et al. [49]	2		1126.96	1132.53	12.5379	0.0110639	157.2		767.392	372.108	0.390277	138464		331.971	807.529	1.09758	652103	2.27123	61.1337	24262.9	197362	14.281	0.272684		781.623	357.877	0.37257	128076	0.876779	0.3335	14.281	2537.89		1183.19	43.6852	0.0376161
8	S8/FRC	152	152	127	31	0.66	1.5	449	55	1	472	Validation data	Cheng and Parra-Montesinos [30]	H		381.409	386.172	90.591	0.212304	8206.72		372.959	99.0412	0.234428	9809.16		137.568	334.432	1.09728	111845	1.62579	32.5675	13370.2	80945.3	18.2106	0.482859		318.846	153.154	0.387317	23456.2	1.55257	0.825	18.2106	985.954		277.65	194.35	0.518507
14	FS-4	125	150	100	35.7	0.56	1	460	100	0.75	224.4	Validation data	Theodorakopoulos and Swamy [31]	C		257.942	260.351	33.5416	0.139078	1125.04	sMAPE	248.367	23.9674	0.101392	574.436	sMAPE	97.7813	126.619	0.786009	16032.3	1.74468	37.125	7305.96	57652.6	10.8235	0.628087		225.808	1.40833	0.00625635	1.98339	1.51465	0.75	10.8235	906.207		207.356	17.0442	0.078953
23	FS-11	125	200	100	34.2	0.56	1	460	0	0	259.8	Validation data	Theodorakopoulos and Swamy [31]			281.344	283.599	21.5436	0.0796227	464.129		286.026	26.2255	0.0960949	687.778		85.826	173.974	1.00672	30266.9	1.70764	34.2	9923.21	66215.9	11.2982	0		97.6277	162.172	0.907441	26299.9	0	0	11.2982	1742.48		222.344	37.4561	0.155373
30	FS-18	125	150	100	14.2	0.56	1	460	70	0.5	166	Validation data	Theodorakopoulos and Swamy [31]	P		192.931	196.208	26.9309	0.150062	725.275		195.841	29.8406	0.164938	890.461		111.003	54.9965	0.397082	3024.62	1.10034	14.865	21458.1	47057.9	27.2113	0.277286		127.581	38.4191	0.261727	1476.02	0.445789	0.35	27.2113	1245.55		116.847	49.1532	0.34756
32	P11F31	155	200	132.7	35.8	0.5	0.39	438	79	0.75	324	Validation data	Alexander and Simmonds [32]	C		416.343	421.229	92.3426	0.249459	8527.15		362.745	38.7448	0.112836	1501.16		107.647	216.353	1.00245	46808.6	1.74713	36.239	10768.7	103627	12.1765	0.193784		257.319	66.6811	0.229413	4446.37	0.467317	0.231075	12.1765	1790.05		346.967	22.9669	0.0684591
35	P38F34	155	200	105.7	38.4	0.63	0.43	438	79	0.75	308	Validation data	Alexander and Simmonds [32]	C		317.019	319.649	9.01896	0.0288598	81.3417		320.782	12.7822	0.0406572	163.386		107.405	200.595	0.965779	40238.3	1.80946	38.8841	10014.2	72262.6	11.3933	0.221282		209.13	98.8703	0.382381	9775.33	0.533629	0.254775	11.3933	1544.51		282.638	25.3619	0.0858796
41	L5	100	80	80	59.7	1.56	1	450	55	1	215.1	Validation data	Hanai and Holanda [28]	H		224.361	224.832	9.26136	0.0421487	85.7728		258.537	43.4375	0.183421	1886.81		93.0624	122.038	0.792035	14893.2	2.25616	60.745	5895.19	28806.9	14.1106	0.44672		192.883	22.2166	0.108909	493.575	1.43637	0.55	14.1106	749.104		151.462	63.6379	0.347215
43	OSC S1	100	80	80	43.7	1.56	0	450	0	0	176.5	Validation data	Hanai and Holanda [28]	0		151.314	152.272	25.1865	0.153663	634.358		200.511	24.0109	0.127375	576.521		95.7519	80.7481	0.593187	6520.26	1.93029	43.7	8743.78	26548.1	19.2769	0		131.185	45.315	0.294555	2053.45	0	0	19.2769	1073.98		114.912	61.5879	0.422686
46	S-1	125	150	100	37.8	0.56	0	460	0	0	197.7	Validation data	Swamy and Ali [33]	0		216.641	218.818	18.9407	0.0914258	358.751		220.875	23.1751	0.110733	537.085		63.8351	133.865	1.02369	17919.8	1.79527	37.8	6857.48	58041.3	10.2222	0		86.4221	111.278	0.783311	12382.8	0	0	10.2222	1542.48		188.866	8.83405	0.0457053
51	S-6	125	150	100	38	0.56	0.9	460	100	0.75	239	Validation data	Swamy and Ali [33]	C		260.54	262.852	21.5401	0.0862397	463.976		252.088	13.0878	0.0533011	171.29		94.0446	144.955	0.870486	21012.1	1.80001	39.2825	6817.59	58076.1	10.1684	0.583203		229.554	9.44567	0.0403184	89.2207	1.40641	0.675	10.1684	969.834		214.278	24.7224	0.109083
59	S-9	125	150	100	38.9	0.37	0.9	460	100	0.75	179.3	Validation data	Swamy and Ali [33]	C		256.363	258.64	77.0628	0.353773	5938.68		154.844	24.4563	0.146382	598.109		71.7628	107.537	0.856655	11564.2	1.8212	40.1825	4236.28	60407	6.56298	0.590069		220.296	40.9963	0.205188	1680.69	1.42297	0.675	6.56298	969.834		207.367	28.0672	0.145175
66	B2-01	120	60	90	103	0.87	0.25	400	65	0.5	318	Validation data	Suter and Moreillon [35]	s		252.175	251.446	65.8254	0.230896	4332.99		305.116	12.8841	0.0413536	165.999		30.3683	287.632	1.65131	82732	2.96348	103.154	1238.85	36896.8	4.56117	0.173363		106.22	211.78	0.998445	44850.8	0.278714	0.08125	4.56117	1039.6		181.07	136.93	0.548742
76	A0	125	200	105	21.7	0.66	0	492	0	0	284	Validation data	Nguyen-Minh et al. [36]	0		248.389	251.51	35.611	0.133778	1268.14		276.723	7.27666	0.0259545	52.9497		139.019	144.981	0.68546	21019.6	1.36023	21.7	22704.1	62199.5	23.5684	0		132.713	151.287	0.726095	22887.7	0	0	23.5684	1789.6		184.012	99.9883	0.42729
90	A3	55	100	39	31.4	1.12	0.8	501	100	1	73.1	Validation data	Harajli et al. [37]	H		72.0215	72.057	1.07854	0.014864	1.16326		43.7035	29.3965	0.50335	864.156		55.8098	17.2902	0.268252	298.95	1.63624	32.92	4938.95	9566.77	10.454	0.471238		47.0453	26.0547	0.433721	678.85	1.51521	0.8	10.454	429.838		46.1086	26.9914	0.452842
91	A4	55	100	39	24.6	1.12	1	501	60	1	64.7	Validation data	Harajli et al. [37]	H		69.2522	69.4092	4.5522	0.0679676	20.7225		24.157	40.543	0.912545	1643.74		60.0206	4.67944	0.0750387	21.8971	1.44827	25.74	6571.4	8598.32	13.3437	0.312827		43.456	21.244	0.39284	451.308	1.00586	0.6	13.3437	514.27		39.6835	25.0165	0.47932
99	S12	60	100	44	49.1	1.61	0.5	670	133	0.5	102.5	Validation data	Yaseen [38]	Pl		88.5217	88.3166	13.9783	0.146353	195.393		123.565	21.0648	0.18636	443.724		105.568	3.0679	0.0294894	9.41203	2.04608	49.7317	7256.93	10397.6	14.4998	0.489833		90.8369	11.6631	0.12065	136.027	0.787497	0.3325	14.4998	665.705		72.3363	30.1637	0.345051
116	S5	60	100	45	53	1.84	1	550	100	0.75	113.6	Validation data	Narayanan and Darwish [27]	C		102.225	101.947	11.3751	0.10541	129.393		141.277	27.6769	0.217179	766.012		100.665	12.9349	0.120737	167.311	2.12579	54.425	6306.67	11429.2	12.8887	0.765285		88.9871	24.6129	0.242986	605.796	1.84551	0.75	12.8887	484.168		80.0423	33.5577	0.346595
137	S2	120	200	100	19.6	0.98	1	500	45	0.5	290	Validation data	Wang et al. [39]	S		261.418	264.411	28.5818	0.103667	816.92		316.326	26.3256	0.0868365	693.037		239.449	50.5511	0.190957	2555.41	1.29274	20.0275	39745.3	46656.2	37.5	0.209424		208.669	81.3311	0.326193	6614.74	0.336688	0.225	37.5	1526.85		186.63	103.37	0.433752
141	a1	150	200	125	25	1.2	0	400	0	0.75	275	Validation data	Abdel-Rahman et al. [40]	تابیده		358.207	363.007	83.2071	0.262812	6923.41		391.819	116.819	0.350377	13646.7		245.621	29.3794	0.112863	863.151	1.46	25	37781.3	74148.1	36	0		258.142	16.858	0.06324	284.19	0	0	36	1978.1		271.405	3.595	0.0131587
153	S80-0-1.0	80	100	64	26.5	1	0	350	0	0	113.3	Validation data	Eltahawy et al. [42]	تابیده		97.224	98.0326	16.076	0.152723	258.437		127.634	14.3339	0.118986	205.46		49.6122	63.6878	0.781866	4056.13	1.50316	26.5	6185.79	21645	12.6792	0		48.8753	64.4247	0.794507	4150.54	0	0	12.6792	1003.19		70.2557	43.0443	0.469005
167	F14-03	150	200	114	89	1.4	0.3	575	67	1	466	Validation data	Chanthabouala et al. [7]	H		547.679	548.363	81.6786	0.161153	6671.39		519.122	53.1221	0.107849	2821.96		251.742	214.258	0.597033	45906.4	2.75472	89.3819	14031.3	78334.8	15.4669	0.199332		483.337	17.3369	0.0365242	300.567	0.640926	0.201	15.4669	1667.21		568.653	102.653	0.19843
182	Cf75fc50	150	200	122	50	0.89	0.764331	530	67.2	1	408.03	Validation data	Ju et al. [9]	H		467.696	470.947	59.6656	0.136265	3559.98		452.928	44.898	0.104298	2015.83		202.848	205.182	0.671759	42099.5	2.06475	50.9759	15876.9	86169.3	17.2642	0.381787		432.327	24.2966	0.0578244	590.323	1.22759	0.513631	17.2642	1399.01		434.308	26.2784	0.0623939
189	S2	125	130	105	40.2	1.3	0	529.7	0	0	305.6	Validation data	Zamri et al. [46]	H		245.919	248.3	59.6805	0.216422	3561.77		300.824	4.77553	0.0157498	22.8057		183.518	122.082	0.499194	14904.1	1.85138	40.2	19073.3	48671.4	26.9791	0		237.402	68.1977	0.251188	4650.93	0	0	26.9791	1509.6		212.173	93.4266	0.360878
198	SFRC2_2	35	100	21.805	40.7	0.87	1	560	60	1	23.7	Validation data	Tan and Paramasivam [47]	H		49.6012	49.3303	25.9012	0.706706	670.872		-18.2418	41.9418	2	1759.12		26.0866	2.38663	0.0958742	5.69599	1.86286	41.84	1672.33	4929.6	3.91526	0.402378		22.8015	0.898524	0.038645	0.807346	1.29379	0.6	3.91526	405.69		26.2456	2.54561	0.101935
204	SFRC4_1	35	100	21.805	37.6	0.87	0.31	560	60	1	19	Validation data	Tan and Paramasivam [47]	H		47.9101	47.6724	28.9101	0.864148	835.794		-8.70634	27.7063	2	767.641		25.3037	6.30368	0.284567	39.7364	1.79051	37.9534	1819.69	4840.65	4.23806	0.119893		17.8234	1.17658	0.0639036	1.38433	0.385499	0.186	4.23806	543.564		24.636	5.63595	0.258317
209	B1-05	120	120	90	99	0.54	0	528	0	0	201	Validation data	Moreillon [48]	0		231.581	231.029	30.5815	0.141391	935.228		251.814	50.8143	0.224438	2582.1		38.3328	162.667	1.35934	26460.6	2.90536	99	1971	47520.9	3.888	0		74.1316	126.868	0.922238	16095.6	0	0	3.888	1328.23		249.399	48.3994	0.214918
216	B5-01	120	120	90	106	0.84	1.01911	504	80	1	369	Validation data	Moreillon [48]	H		360.477	359.513	8.52266	0.0233665	72.6357		408.153	39.1531	0.10076	1532.97		93.1464	275.854	1.19379	76095.2	3.00632	107.549	2789.56	46691	5.39185	0.882366		312.206	56.7941	0.166746	3225.57	2.83713	0.815287	5.39185	732.643		315.993	53.0069	0.154766
223	BCV-1%A-40-1.02	40	80	20	157	1.02	1	623	72.5714	0.5	49	Validation data	Moreillon [48]	S		56.1121	54.8508	7.1121	0.135324	50.582		252.662	203.662	1.35027	41478.1		19.5	29.5	0.861315	870.252	3.65875	157.689	398.779	4307.57	1.21425	0.955874		28.0535	20.9465	0.543687	438.755	1.53675	0.362857	1.21425	407.015		44.8313	4.16867	0.0888545
228	BCV-2%-60-1.66	60	80	40	152	1.66	2	556	66.67	0.5	132	Validation data	Moreillon [48]	S		151.33	149.295	19.3301	0.136449	373.652		379.364	247.364	0.967467	61188.7		57.5848	74.4152	0.785034	5537.63	3.60002	153.267	1257.83	10856.1	3.64326	1.72809		99.203	32.797	0.283708	1075.64	2.77823	0.6667	3.64326	441.415		107.718	24.2818	0.202586
233	S1C1	200	400	160	60.5	0.9	0	400	0	0	853	Validation data	Grimaldi et al. [49]	0		984.444	989.651	131.444	0.143073	17277.6		687.157	165.843	0.215359	27504		283.954	569.046	1.001	323814	2.27123	60.5	24262.9	197362	14.281	0		389.366	463.634	0.746372	214956	0	0	14.281	3107.97		1025.6	172.598	0.183752
[truncated: 14 more columns]
